1                   **Assessing risk for butterflies in the context of climate change,**  
2                   **demographic uncertainty, and heterogenous data sources**

3  
4           Matthew L. Forister<sup>1</sup>, Eliza M. Grames<sup>1</sup>, Christopher A. Halsch<sup>1</sup>, Kevin J. Burls<sup>2</sup>,  
5           Cas F. Carroll<sup>1</sup>, Katherine L. Bell<sup>1</sup>, Joshua P. Jahner<sup>3</sup>, Taylor Bradford<sup>1</sup>, Jing Zhang<sup>4</sup>,  
6           Qian Cong<sup>5</sup>, Nick V. Grishin<sup>4,6</sup>, Jeffrey Glassberg<sup>7,8</sup>, Arthur M. Shapiro<sup>9</sup>, Thomas V. Riecke<sup>10</sup>

7  
8           <sup>1</sup> Ecology, Evolution and Conservation Biology, Department of Biology, University of Nevada,  
9           Reno, Nevada, USA

10           <sup>2</sup> Xerces Society for Invertebrate Conservation, Portland, Oregon, USA

11           <sup>3</sup> Department of Botany, University of Wyoming, Laramie, Wyoming, USA

12           <sup>4</sup> Howard Hughes Medical Institute, University of Texas Southwest Medical Center, Dallas,  
13           Texas, USA

14           <sup>5</sup> Institute for Protein Design and Department of Biochemistry, University of Washington,  
15           Seattle, Washington, USA

16           <sup>6</sup> Departments of Biophysics and Biochemistry, University of Texas Southwest Medical Center,  
17           Dallas, Texas, USA

18           <sup>7</sup> North American Butterfly Association, Morristown, New Jersey, USA

19           <sup>8</sup> Department of BioSciences, Rice University, Houston, Texas, USA

20           <sup>9</sup> Center for Population Biology, University of California, Davis, California, USA

21           <sup>10</sup> Swiss Ornithological Institute, CH-6204 Sempach, Switzerland

22           **Correspondence:** Matthew L. Forister, [mforister@unr.edu](mailto:mforister@unr.edu)

23           **Open Research Statement:** all data will be archived on Dryad upon acceptance for publication.

24 **Abstract**

25 Ongoing declines in insect populations have led to substantial concern and calls for conservation  
26 action. However, even for relatively well-studied groups, like butterflies, information relevant to  
27 species-specific status and risk is scattered across field guides, the scientific literature, and  
28 agency reports. Consequently, attention and resources have been spent on a miniscule fraction of  
29 insect diversity, including a few well-studied butterflies. Here we bring together heterogeneous  
30 sources of information for 396 butterfly species and 1,004 subspecies to provide the first regional  
31 assessment of butterflies for the 11 western US states. For 184 species, we use monitoring and  
32 other observational data to characterize historical and projected trends in population abundance;  
33 for another 212 species (for which sufficient observational data are not available), we use  
34 exposure to climate change, development, geographic range, host breadth and other factors to  
35 rank species for conservation concern. We also organize information relevant to subspecific risk  
36 and prioritize a top 50 subspecies for further attention. A phylogenetic signal is apparent, with  
37 concentrations of declining and at-risk species in the families Lycaenidae and Hesperiidae. A  
38 geographic bias exists in that many species that lack monitoring data occur in more southern  
39 states where we expect that impacts of warming and drying trends will be most severe. Legal  
40 protection is relatively uncommon among the taxa with the highest risk values: of the top 100  
41 species, one is listed as threatened under the US Endangered Species Act and one is a candidate  
42 for listing; of the top 50 subspecies, 15 have federal legal protection and one is under review for  
43 protected status. Among the many taxa not currently protected, we highlight a short list of  
44 species in decline, including *Vanessa annabella*, *Thorybes mexicanus*, *Euchloe ausonides*, and  
45 *Pholisora catullus*. Notably, many of these species have broad geographic ranges, which perhaps

46 highlights a new era of insect conservation in which small or fragmented ranges will not be the  
47 only red flags that attract conservation attention.

#### 48 **KEYWORDS**

49 Anthropocene, butterfly, climate change, Lepidoptera, population viability analysis,  
50 demographic uncertainty, extinction, heterogeneous data, hierarchical Bayesian model

51

52

#### 53 **INTRODUCTION**

54 Reductions in abundance, contractions in geographic range, extirpation, and extinction have  
55 become common features of wild plant and animal populations impacted by the various stressors  
56 of the Anthropocene (Dirzo et al. 2014, Turvey and Cries 2019). Effects on individual  
57 populations translate into depauperate assemblages of species in remaining natural lands, even  
58 those far removed from the most immediate effects of habitat destruction and degradation  
59 (McLaughlin et al. 2002, Brook et al. 2008). To the extent that the loss of evolutionary lineages  
60 (populations, species and higher taxonomic groups) is a part of life on earth and always has been,  
61 the current mass extinction crisis affords ecologists the chance to study extinction as an  
62 important earth-system process (Benton 2003). However, the need to maintain functioning  
63 natural ecosystems is increasingly generating motivation among scientists and the general public  
64 to reverse or slow whatever biotic losses might still be addressed (Naeem et al. 2016). Concern  
65 for functioning ecosystems has been elevated in recent years by a steady pulse of papers  
66 reporting declines in insect abundance and diversity (Eisenhauer et al. 2019, Wagner 2019) that  
67 have inspired calls for new conservation attention focused on "the little things that run the world"  
68 (Wilson 1987, Goulson 2019, Cardoso et al. 2020).

69 For certain charismatic and well-studied organisms, like the greater sage-grouse  
70 (*Centrocercus urophasianus*) or the desert tortoise (*Gopherus agassizii*), governmental agencies  
71 have been mobilized on a regional scale to monitor populations and management efforts, often in  
72 a proactive rather than reactive way (Pilliod et al. 2020). That kind of conservation and  
73 management depends on the synthesis of multiple lines of information including population  
74 monitoring, natural history studies, and geographic surveys. For insects, the taxonomic diversity  
75 is so great and the available information is so sparse (Cardoso et al. 2011), that proactive  
76 conservation informed by diverse data types has rarely been an option. As a consequence, insect  
77 conservation has often been motivated largely by fragmentation and small geographic ranges  
78 (Samways 2007, Diniz-Filho et al. 2010). Exceptions to that pattern include a few European  
79 countries where studies of butterflies have been sufficiently thorough in terms of natural history  
80 and monitoring that researchers have been able to prioritize species for conservation attention in  
81 a way that follows the International Union for Conservation of Nature (IUCN) and the Red List  
82 framework (Fox et al. 2011, van Swaay et al. 2011, Maes et al. 2012, Bonelli et al. 2018). That  
83 depth of species-specific information for insects is unusual, even for butterflies, and most  
84 countries will have a more complex mix of some monitoring or observational data, natural  
85 history observations, and expert opinion (New et al. 1995, Edge and Mecenero 2015, Geyle et al.  
86 2021).

87 Butterflies in the western United States provide an excellent case study for the challenge  
88 of conservation prioritization that involves a mixture of heterogenous data types and sources of  
89 information. The region does include butterfly monitoring programs, but also expansive areas  
90 that are sparsely populated and understudied, including in particular the Intermountain West with  
91 hundreds of mountain ranges in the nearly 500k square kilometers of the Great Basin Desert. The

92 most temporally-intensive butterfly monitoring program in the western US is the Shapiro transect  
93 of ten permanent sites across Northern California that have been monitored biweekly during the  
94 flight season for between 35 and 51 years (Shapiro 2022). Many years before the entomological  
95 world made a collective pivot to the problem of insect declines (Hallmann et al. 2017), work  
96 with the Shapiro data documented shifting spring phenologies (Forister and Shapiro 2003), and  
97 the influence of land use and warming temperatures on extensive declines in abundance and  
98 species richness (Forister et al. 2010, Casner et al. 2014b).

99         Within the last couple of years, the issue has been raised of geographic and taxonomic  
100 heterogeneity or consistency of declines (Crossley et al. 2020, van Klink et al. 2020). This was  
101 the impetus for asking if results from the temporally-intensive Shapiro dataset would be  
102 consistent with geographically-extensive monitoring data from the North American Butterfly  
103 Association (NABA) and iNaturalist observations across the 11 western states (Forister et al.  
104 2021). That effort quantified a compounding loss of 1.6% fewer butterflies observed per year and  
105 highlighted the negative influence of warming and drying conditions on butterfly populations in  
106 natural areas. However, the species included in Forister et al. (2021) were only those common  
107 and widespread enough to be present with sufficient frequency in monitoring databases to allow  
108 for inclusion in statistical models. Moreover, an attempt was not made to combine different lines  
109 of information into a ranking of species for conservation concern.

110         Here we address that need by taking a multi-faceted approach to conservation  
111 prioritization that utilizes observational data when available (for approximately half the species)  
112 and a combination of data types for other species, including natural history traits and quantitative  
113 estimates of exposure to climate change and development. We also include an assessment of  
114 subspecies using a combination of conventional conservation rankings and data on historical

115 occurrences. The different data types are detailed below and are used (1) to produce a  
116 quantitative ranking that highlights the taxa most severely declining and most likely to face  
117 regional extirpation or extinction in coming decades; and (2) to identify geographic and  
118 taxonomic knowledge gaps in our understanding of western butterflies. It is our hope that these  
119 results will be used by conservation practitioners and land managers to guide restoration and  
120 protection efforts, and will also motivate additional monitoring and the development of new  
121 population models that take maximum advantage of the heterogenous data types we have  
122 brought together. Throughout this paper, we use the word "risk" (and related terms, like "risk  
123 index") in a flexible way that encompasses evidence of past decline, projected declines, and  
124 combinations of traits that could predispose species to ongoing and future declines. This  
125 flexibility is necessary given the nature of our project encompassing species for which different  
126 kinds and quantities of information are available, but in all cases we intend the concept of high  
127 risk to flag species that could profitably receive careful attention from ecologists, conservation  
128 biologists, and the general public.

129

## 130 **MATERIALS AND METHODS**

131 A schematic overview of our methods is shown in Figure 1, emphasizing the flow of information  
132 from external data sources through analyses to the generation of quantitative risk assessment. All  
133 parts of the process are discussed in detail here. Starting with the 875 taxa on the North  
134 American Butterfly Association's 2nd edition checklist of butterflies occurring north of Mexico  
135 (NABA 2018), we retained 396 species with resident (non-vagrant) status in the eleven western  
136 states (Washington, Oregon, California, Idaho, Montana, Nevada, Wyoming, Colorado, Utah,  
137 New Mexico, and Arizona) based on range maps in Glassberg (2017), and collapsed 18

138 subspecies into full species. For clarity and in order to facilitate wide use of our results, we also  
139 reference a second checklist by Pelham (2022) in places where names differ. The Pelham list  
140 includes a larger number of subspecies and is thus important in particular for our organization of  
141 subspecific risk information, discussed in detail below.

142         Of the 396 species from the NABA list, 184 were present in monitoring databases (either  
143 the Shapiro transect or the NABA count circles) with sufficient frequency to be used in  
144 population models. For those species, which we will refer to in text and in figures as the "A  
145 group", our approach is to rank species based on observed and forecast population trajectories.  
146 Acknowledging the great uncertainty inherent to insect time series analyses, we present the  
147 ranking of A group species in a way that risk associated with other variables (e.g., geographic  
148 range size) can be evaluated by the reader. As will be discussed below, we use iNaturalist  
149 observations for A group species as a third source of historical information, but give it  
150 proportionally less weight than the Shapiro or NABA data.

151         For the other 212 species (the "B group", not present in monitoring schemes in sufficient  
152 frequency for inclusion in core population models), we have accumulated seven variables that  
153 form a composite picture of risk: geographic range, exposure to developed land, exposure to  
154 climate change, average (range-wide) precipitation, voltinism (number of generations per year),  
155 wingspan, and host breadth (or "host range"). We combine those seven variables into a single  
156 risk index as a weighted sum, where the weights are determined in part by our previous work  
157 with western butterflies, but also by analyses of the A group (described in detail below). The  
158 weighting scheme and other steps in data processing involve informed but partly subjective  
159 judgements with respect to threats to butterflies and natural history traits that predispose  
160 butterflies to risk. We have presented all data decisions in a transparent way, so that the reader

161 can judge for themselves the consequences of our methods and decisions, and alternative weights  
162 can be assigned by researchers using an online tool (see supplementary material). In the sections  
163 below, we describe first the three observational datasets (Shapiro, NABA, and iNaturalist) and  
164 associated analyses, then the seven other variables and how they are combined into composite  
165 risk indices and are visualized geographically and in a phylogenetic context.

166

### 167 **North American Butterfly Association (NABA) counts and models**

168 The NABA butterfly count program is a suite of hundreds of individual locations throughout the  
169 country that are monitored during midsummer (typically once, but in some cases more than  
170 once) by a group of at least four observers recording counts of all individual butterflies seen and  
171 identified to species, in a 15-mile (24.14 km) diameter circle. Observations from count circles in  
172 the 11 western states encompass different numbers of years at different sites from the 1970s to  
173 the present, with the final year in the dataset we examined being 2018 (the data were compiled  
174 for analysis in 2019). For the current project, we filtered the observations so that we only  
175 included sites that had been monitored for at least ten years, and with the final year being 2017  
176 or 2018 (we did this so as not to generate forecasts for species with a substantial recent gap in  
177 observations). More than one monitoring day has been reported per year at a small number of  
178 sites, and for those locations we retained only the survey closest to the 4th of July, which is the  
179 traditional target date for these censuses. We then excluded any site-by-species combinations in  
180 which a species was not present for at least ten years (not necessarily consecutive years); finally,  
181 only species meeting the latter criterion for at least three locations were retained. Those filters  
182 resulted in a dataset with 162 species from 44 locations used in the core model and associated  
183 population forecasts (we experimented with less stringent filters but found that model



184 performance suffered). For species with less data, we ran a second set of models with lower  
185 thresholds, as described after the core model below.

186 Previous work with the NABA data used hierarchical Bayesian linear Poisson regressions  
187 run separately for each species (Forister et al. 2021). Here we advance that approach using a  
188 single, multi-species model that shares information about heterogeneity in the observation  
189 process across species observed at each site (Riecke et al. 2021). The components of the model  
190 (each described in turn below) include an observation sub-model, an abundance sub-model, and  
191 a forecast or simulation process that projects occupancy (the fraction of sites with non-zero  
192 presence by species) for various intervals of years in the future.

193 For the observational component, we modeled the counts of individual butterflies ( $y$ )  
194 using a Poisson distribution given the expected count of each species at each location during  
195 each year ( $\mu_{t,l,s}$ ), where  $t$ ,  $l$ , and  $s$  identify the year, location, and species respectively:

$$196 \quad y_{t,l,s} \sim \text{Poisson}(\mu_{t,l,s}).$$

197 We modeled the expected count ( $\mu_{t,l,s}$ ) as a function of an abundance index ( $N_{t,l,s}$ ), year- and  
198 site-specific survey effort ( $\beta$ ), and a year- and location-specific random effect ( $\delta_{t,l}$ ) shared  
199 among species:

$$200 \quad \mu_{t,l,s} = \exp(\ln(N_{t,l,s}) + \beta * \text{effort}_{t,l} + \delta_{t,l}),$$

201 with a vague prior for the effect of survey effort:

$$202 \quad \beta \sim \text{normal}(0,10).$$

203 The empirical variable for effort is the z-standardized total hours searched by all survey groups  
204 at a site on a day. After accounting for the effect of survey effort, we modeled additional  
205 variation in detection probability for each survey or monitoring day as a random effect shared  
206 among species. This random effect can be thought of as the combined effects of survey-specific

207 variation in detection due to processes such as variation in observer experience and local weather  
208 conditions (Riecke et al. 2021):

$$209 \quad \delta_{t,l} \sim \text{normal}(0, \zeta^2),$$

$$210 \quad \zeta \sim \text{gamma}(1,1).$$

211 For the abundance sub-model, we assigned priors for initial population abundance indices  
212 for each species at their first encounter ( $f_{\text{site}_i, \text{species}_i}$ ) at a study site as a function of initial survey  
213 effort and the initial count:

$$214 \quad N_{f_{i,s}, l, s} \sim \text{gamma}(\exp[\ln(y_{f_{i,s}, l, s}) + (\text{effort}_{f_{i,s}, l, s} * -0.1)], 1).$$

215 We modeled changes in population size (N) from one year to the next for each species at each  
216 site as a function of year (t), location (l), and a species(s)-specific population growth rate ( $\lambda$ ):

$$217 \quad N_{t+1, l, s} = N_{t, l, s} * \lambda_{t, l, s}.$$

218 Variation in population growth rate was in turn modeled as a function of a species-specific mean  
219 population growth rate ( $\gamma_s$ ), and species-specific random variance in population growth rate:

$$220 \quad \lambda_{t, l, s} \sim \text{lognormal}(\gamma_s, \sigma_s^2),$$

$$221 \quad \gamma_s \sim \text{normal}(0,1),$$

$$222 \quad \sigma_s^2 \sim \text{gamma}(1,1).$$

223 Finally, for each species at each location, we projected the abundance index into the  
224 future using Monte Carlo simulation from the posterior distributions of species-specific  
225 population growth rate ( $\lambda_{t, l, s}$ ), and species-specific population growth rate variance ( $\sigma_s^2$ ):

$$226 \quad N_{t+1, l, s} = N_{t, l, s} * \lambda_{t, l, s},$$

$$227 \quad \lambda_{t, l, s} \sim \text{lognormal}(\gamma_s, \sigma_s^2).$$

228 We defined local ‘extirpations’ as locations at which the expected count of a species given mean  
229 effort was less than 0.1 individuals, and calculated extirpation probability for each species at 10,

230 20, and 50 years into the future. Thus, one minus the extirpation probability is the probability of  
231 population persistence, and it is that value (probability of persistence) for each species from the  
232 core NABA model that moves forward (represented by 1k samples from the final year of the  
233 simulations) into the calculation of the risk index for the A group species.

234 The above model and 50-year projections were used for 162 species (in the A group) with  
235 sufficient data (passing filters described above). For another 105 species (with a median presence  
236 of 2 sites per species), we used a less complex model. These species are part of the B group with  
237 minimal observational data that were too sparse to be included in the core NABA model  
238 described above. However, in the interest of presenting maximal information on all species, we  
239 estimated trends through time for this subset of the B group (albeit at many fewer sites per  
240 species); the results are reported but not incorporated into the risk index calculation for these  
241 species. In this model, the counts ( $y$ ) were also modeled with a Poisson distribution given the  
242 expected count for each location and year ( $\mu_{t,l}$ ), where  $t$  is the year and  $l$  is the location:

$$243 \quad y_{t,l} \sim \text{Poisson}(\mu_{t,l}).$$

244 The expected count ( $\mu_{t,l}$ ) was then modelled as a linear function of a site-specific intercept ( $\alpha_1$ ), a  
245 site-specific ( $s$ ) year effect ( $\beta_1$ ), and site-specific effect of effort ( $\beta_2$ ):

$$246 \quad \ln(\mu_{t,l}) = \alpha_1 + \beta_{1,s} * \text{year}_t + \beta_{2,s} * \text{effort}_{t,l}.$$

247 The intercept and both beta coefficients were drawn from normal priors, with the normal  
248 truncated at zero to be positive for effort ( $\beta_2$ ); the means and variances of those distributions  
249 were in turn drawn from hyperpriors (thus estimating effects across sites) with means drawn  
250 from normal distributions (with mean of zero and variance of 100) and variances drawn from  
251 gamma(1,1) as in the core model above. For 35 species present at only a single site, the model  
252 was run without the hierarchical (across sites) structure. The output of these secondary models

253 (for the 105 species) was retained as a directional probability (the fraction of the posterior  
254 distribution above zero for species with a positive year coefficient, and below zero for species  
255 with a negative year coefficient).

256 All Bayesian models were implemented using JAGS (version 4.3) and the `jagsUI`  
257 package (Kellner 2017) in R (R Core Team 2020). The core model (for A group species) was run  
258 with three chains for 500k iterations, with a 250k iteration burn-in. The secondary models (for  
259 the 105 B group species with some presence in the NABA data) were run with two chains for 2k  
260 steps and a 1k burn-in. Model diagnostics included inspection of plots of chain histories (all  
261 chains converged;  $\hat{R} < 1.01$ ), and effective samples sizes.

262

### 263 **Shapiro transect data and models**

264 Ten long-term study sites across northern California have been monitored for between 35 and 51  
265 years (depending on the site), with the presence of all butterflies noted along fixed routes every  
266 two weeks during the flight season. Data used here were compiled in 2021, including  
267 observations through 2020; earlier years were truncated so the dataset starts at 1985, except for  
268 three sites where data collection began in 1988. Species by site combinations of at least eight  
269 years were retained for analyses of 133 species. Additional details on sites, butterflies and field  
270 methods have been described elsewhere (Forister et al. 2010, Halsch et al. 2021, Shapiro 2022).

271 In brief, data from the Shapiro sites have been analyzed using hierarchical Bayesian linear  
272 models in which the response variable (the number of days a species is observed in a year) is  
273 modeled as a binomial process, with a beta coefficient from the year term in the linear model  
274 representing change through time in the probability that a species is observed (Nice et al. 2014,  
275 Halsch et al. 2021). Here we use the version of this model and implementation as described in

276 Forister et al. (2021) in which the model was run separately for each species and beta  
277 coefficients for years are estimated within and across sites; the higher level coefficients (across  
278 sites) are used as indices of population change for each species across the northern California  
279 sites. As with the NABA models, model diagnostics included inspection of convergence and  
280 effective sample sizes. For downstream analyses (the creation of the risk index for A group  
281 species), 1k samples were retained from the posterior distributions of the year coefficients  
282 estimated across sites for each species. For two species, *Lycaena rubidus* and *Agraulis vanillae*,  
283 the year coefficients were extreme outliers (in the negative and positive direction, respectively)  
284 and were not used in the creation of the risk index values (described below) but we do include  
285 those coefficients in visual summaries of patterns across species.

286         The year coefficients from this modeling approach have been shown to be effective  
287 indices of change in total abundance as reflected in total counts of individuals which are  
288 available from a subset of years and sites (Casner et al. 2014a). Unlike the main NABA model,  
289 described in the previous section, we have not taken a forecasting approach with the Shapiro  
290 data. The two datasets have different strengths and weaknesses. The strengths of the Shapiro data  
291 are intensity and consistency of observation, which lend precision to estimates of species-  
292 specific change through time. In contrast, the NABA observations are only once per year, but the  
293 geographically distributed nature of the NABA sites (with greater independence among  
294 locations) lends value to the forecasting of population occupancy with our simulation approach  
295 (which does not account for dispersal or demographic connections among locations).

296

297 **iNaturalist observations and expected ranges**

298 Observations recorded on the iNaturalist platform are a wealth of geographic and phenological  
299 information, which researchers are increasingly using to answer ecological questions (Prudic et  
300 al. 2018, Kirchoff et al. 2021), even for rare insects (Wilson et al. 2020). In our previous work  
301 with western butterflies, we used iNaturalist records in time series models, which revealed trends  
302 that were generally consistent with temporal patterns in the NABA and Shapiro data (Forister et  
303 al. 2021). Here we take a different approach, with the goal of using the broad geographic  
304 coverage of iNaturalist records to generate information on species status that is complementary  
305 to the detailed time series information from the other two observational datasets. We used  
306 iNaturalist records from the last 15 years (2007-2021) to generate a community scientist-derived  
307 estimate of area of occupancy. Those area of occupancy estimates were then compared to expert-  
308 derived range area estimates (described below) in a simple linear regression, and residuals from  
309 that relationship were saved. In other words, we asked which species have been seen more or less  
310 frequently in the last 15 years relative to the expected area based on the expert-derived range.

311 To generate the citizen scientist-derived area of occupancy estimates, we downloaded  
312 iNaturalist research grade observations from the Global Biodiversity Information Facility  
313 (GBIF.org 2021a, 2021b, 2021c, 2021d, 2021e, 2021f) for all butterfly species in the 11 western  
314 states. We retained observations from 2007 onwards for species that were observed at least 100  
315 times (with very few exceptions, these were all A group species, present in Shapiro or NABA  
316 datasets, thus the analysis of iNaturalist records was confined to the A group). We calculated an  
317 unweighted Gaussian Kernel Density estimate using the function `sp.kde` from the R package  
318 `spatialEco v1.3-7` (Evans and Ram 2021) based on the iNaturalist observations with a  
319 distance bandwidth of 2 (four examples are shown in Figure S1). The resulting raster was

320 converted to a disjoint spatial polygon (i.e. not all parts of the range needed to be connected) that  
321 encompassed all values  $> 0.00001$  and calculated the area of the resulting range map.

322

### 323 **Geographic ranges and voltinism**

324 Expert-derived range estimates from Glassberg (2017) were generated from Keyhole Markup  
325 Language (.kml) files for each species. The range of each species was separated by voltinism  
326 (the number of generations per year in different portions of the range), with spatial polygons  
327 retained separately for uni-, bi-, and multivoltine regions. Quantitative areal estimates were then  
328 derived for all range portions within 11 western states using the area function in the R package  
329 `raster v3.5-11` (Hijmans et al. 2021), which estimates area based on the size of raster cells.

330 This estimate is biased closer to the poles; however, we only generated range areas within the 11  
331 western states (excluding portions of ranges that extended farther east, north into Canada, or  
332 south into Mexico) and thus the bias is expected to be minimal.

333 The expert-derived geographic ranges were used for multiple purposes (see Figure 1),  
334 including comparison with iNaturalist ranges (described in the previous section). The total  
335 expert-derived range estimates for each species were also used as a variable that contributes to  
336 the composite risk index, as did the fraction of the range that was univoltine (i.e., for simplicity,  
337 we focus on a univoltine vs bi- plus multivoltine comparison, rather than considering bivoltinism  
338 as a distinct category). The outlines of the expert-derived ranges were also used to calculate  
339 exposure to land use and climate (as described in the next section) and to calculate weighted  
340 latitudinal midpoints as another geographic descriptor. We used the function `rasterToPoints` from  
341 the `raster` package v3.5-11 (Hijmans et al. 2021) to convert each species range map to

342 coordinates; weighted latitudinal midpoints were then calculated that account for the longitudinal  
343 width of the range (i.e. the mean latitude across all cells in the raster).

344 As yet another line of expert-derived geographic information, we assigned each species a  
345 qualitative biogeographic designation of North, South, East, or West to reflect where the  
346 majority of the range area is found. For example, species labelled as western have the majority of  
347 their range in the 11 western states, with a minor presence north or south of the US borders or in  
348 the eastern states. Northern species have most of their range in Canada with only outlier (and  
349 often isolated) locations in the western US; similarly, southern species are those with ranges in  
350 Mexico often extending only dozens or hundreds of square kilometers into Arizona or New  
351 Mexico. Finally, species were labelled as eastern if they either had a transcontinental range (e.g.,  
352 *Pieris rapae*, *Vanessa cardui*) or had a range almost entirely in the eastern states with only a  
353 minority of the range area in the 11 western states. These assignments were made by visual  
354 inspection of range maps in field guides (Scott 1986, Glassberg 2017).

355

### 356 **Land use and climate change**

357 Previous work with butterflies in our region has revealed effects of land use and climate change  
358 that are complex, potentially interacting, and dependent on both the species involved and the  
359 landscape context (Casner et al. 2014b, Forister et al. 2018, Halsch et al. 2021). Summarizing  
360 exposure to land use and climate change is not a simple task, but we have taken the relatively  
361 straightforward option of using the range outline (described in previous section) to quantify these  
362 stressors within the range of each species. Note that this differs from the use of point locations to  
363 quantify proximity to, for example, urban development (Jamwal et al. 2021). The range-outline  
364 approach is a better fit for our goals simply because all species have the same starting data (the



365 expert-derived ranges), which would not be true of 396 species using available point-occurrence  
366 records in, for example, iNaturalist. For highly mobile animals, like butterflies, the range-outline  
367 method has another advantage in that we do not have to assume that point locations of  
368 observations represent the only or most relevant habitats.

369 To quantify land use change, we reclassified the 2020 Cropland Data Layer (USDA  
370 2020) into land cover types of agriculture, development, or natural and semi-natural habitats  
371 using the associated Cropland Data Layer scheme; all crops were classified as agriculture,  
372 development of any intensity level as development, and remaining land cover types (including  
373 pastureland) as natural or semi-natural habitat. For each species, we used the spatial polygon  
374 generated from the range map to clip the rasterized land cover types and calculated the  
375 proportion that was agriculture or development. This was done separately for regions of different  
376 voltinism, but these were summed to a single value for each species (see Figure S2 for examples  
377 of range-wide exposure to land use).

378 To estimate climate change exposure, we used TerraClimate data for minimum  
379 temperature, maximum temperature, and precipitation (Abatzoglou et al. 2018), which we  
380 resampled from ~4km spatial resolution to ~40km for computational efficiency. Using  
381 multivariate Mahalanobis distance as a measure of departure (Farber and Kadmon 2003,  
382 Abatzoglou et al. 2020), we calculated departure from baseline conditions (1958-1987) for the  
383 most recent thirty years (1991-2020) for each cell. To estimate exposure to climate change, we  
384 calculated rate of change in departure over time using Theil-Sen slopes (Theil 1950, Sen 1968)  
385 which estimate the median slope between each pairwise set of observations and are relatively  
386 robust to outliers near the start or end of a series. We generated a raster of these trends in  
387 departures for the eleven western states. For each species, we then clipped the climate departure

388 raster layer using the species range maps as spatial polygons and calculated the mean climate  
389 change exposure across that portion of the range (as with land use, this was done separately by  
390 voltinism, but then added for a single value per species for further analyses; see Figure S2 for  
391 examples). We also calculated 30-year climate normals (1991-2020) for minimum temperature,  
392 maximum temperature, and precipitation annually and within each season across the entire range  
393 for each species. Among those three variables, precipitation was recently found to be predictive  
394 of changes in butterfly abundance across the west (Forister et al. 2021), thus it was used as a  
395 static description of climate for inclusion in the composite risk index (described below).

396

### 397 **Wingspan and host range**

398 Among the many morphological and natural history traits that could be informative of status and  
399 risk, body size and ecological specialization are widely studied, and thus relevant data are  
400 available for many species. More narrow diets are often associated with greater sensitivity to  
401 habitat loss and other disturbance (Hughes et al. 2000), and dispersal ability is a key determinant  
402 of metapopulation resilience in the face of fragmentation or other stressors. Wingspan has been  
403 shown to be a proxy for dispersal ability in butterflies (Sekar 2012). For most of the butterflies  
404 studied here, wingspan was previously estimated (in Forister et al. 2021) with data derived from  
405 Opler (1999). For a small number of species included in the present study for which a  
406 measurement was not available from that source, we supplemented with ad hoc online searches.  
407 Similarly with diet breadth (or host range), we used a single source for the vast majority of  
408 species (Scott 1986), and supplemented from other field guides and other online resources for the  
409 few species with missing data.

410 We gathered both the number of plant genera and plant families reported as caterpillar  
411 hosts for each species, and then calculated a combined index of diet breadth as the number of  
412 taxonomic families plus the natural log of the number of genera. That calculation of taxonomic  
413 diet breadth puts most weight on the number of families but allows for some influence of the  
414 number of genera eaten. For example: a species that uses hosts in two genera in two families  
415 would have a diet breadth of 2.69 ( $2 + \ln(2)$ ), while a species that uses plants in three genera in  
416 two families would have a diet breadth of 3.10 ( $2 + \ln(3)$ ). We did not attempt to gather species-  
417 level host records, for which too much data would be missing or unreliable.

418

### 419 **Transformations**

420 In total, we compiled ten variables that contribute to the prioritization of A and B group species  
421 in different ways: (1) 50-year occupancy projections (probabilities of population persistence)  
422 based on NABA data; (2) historical rates of change from the Shapiro data; (3) recent change in  
423 range based on the difference between community scientist-derived and expert-derived ranges;  
424 (4) geographic range based on expert assessment; (5) exposure to agricultural and other  
425 developed lands; (6) exposure to climate change; (7) average precipitation throughout the range;  
426 (8) the fraction of the range with one generation per year; (9) wingspan; and (10) an index of diet  
427 or host breadth (Figure 1). Prior to their use in assigning a risk value to each species (discussed  
428 in the next section), each variable was subjected to a specific set of transformations that resulted  
429 in a variable with a range of 0 to 1 where larger values represent greater risk. Depending on the  
430 nature of the variable (when larger values do or do not naturally represent higher risk), the  
431 transformations included inversion, and (for all variables) standardization between 0 and 1 (by  
432 dividing by the largest value). In some cases, for highly skewed variables, a natural log

433 transformation was applied as the first step. For example, wingspan was first log transformed,  
434 then multiplied by -1, such that all values become negative and the larger wingspans become  
435 larger negative numbers; the distribution was then shifted to the positive by adding the absolute  
436 value of the smallest (most negative) value to all of the numbers; finally, the distribution was  
437 divided by the largest value, thus scaling the numbers between 0 and 1, where the smallest  
438 wingspans (representing the greatest risk because of less dispersal ability) are now closest to 1.  
439 All transformations and scaling steps are illustrated in Figure S3.

440 For visualization of the transformed and scaled variables, we divided the distributions  
441 (Figure S3) into quantiles and assigned circles of different sizes to the different intervals, with  
442 larger circles indicating larger values and greater assumed risk. For most of the variables, we  
443 found that the following breakpoints provided a useful assignment of circles for visualization:  
444 0.15, 0.5, and 0.85; in other words, the interval from 0 to 0.15 was assigned the smallest circle  
445 (the least risk), from 0.15 to 0.5 the next largest, etc. Breakpoints differed for some of the more  
446 skewed variables (e.g., host range), but the results are interpreted in the same way (larger circles  
447 represent larger assumed risk).

448

#### 449 **Calculation of risk index for A and B group species**

450 The A group species are those species for which data were available from at least one of the  
451 monitoring programs (Shapiro or NABA), and many of these species also had enough iNaturalist  
452 observations for analysis. For these species, we calculated a weighted sum based on those three  
453 lines of information with weights as follows: 47.5% NABA, 47.5% Shapiro, and 5% iNaturalist.  
454 The small weight given to the iNaturalist data reflects the fact that the data are heterogeneous (in  
455 space and among species) and rapidly accumulating; these data are thus complex and potentially

456 important but still only barely explored from an analytical perspective. Alternative weighting  
457 schemes among all variables (including the three observational variables) can be explored using  
458 an interactive, online tool; see supplementary material.

459 The variables used in our A group weighting scheme (multiplied by the three  
460 percentages, 47.5%, 47.5%, and 5%) were the 50-year probabilities of persistence (from NABA),  
461 historical rates of change (from Shapiro), and observed range changes (from iNaturalist) that had  
462 been transformed (see previous section) such that larger values represent greater evidence for  
463 decline or (in the case of NABA) projected decline. Thus, a species with the most severe  
464 declining values (historical or projected) for each dataset would receive a composite risk score of  
465 1. To incorporate uncertainty retained from Bayesian analyses of the NABA and Shapiro data,  
466 the composite risk index was recalculated 1k times using 1k samples of the relevant posterior  
467 distributions; we then calculated a mean and 85% highest density interval of risk for each  
468 species.

469 The B group species are those lacking observational data. Thus, we used a composite of  
470 the other seven variables to estimate risk. We experimented with a number of weighting schemes  
471 for those seven variables and settled on an approach that was partly influenced by previous  
472 research (e.g., Forister et al. 2021) but also informed by an additional analysis of the species in  
473 the monitoring data. Specifically (for that additional analysis), we took the composite risk index  
474 for the A group species (based on NABA, Shapiro, and iNaturalist data) and used linear  
475 regression models to determine which of the other seven variables were most predictive of that  
476 risk index (following general protocols with other Bayesian models as described above). The  
477 exact weighting scheme for B group species (influenced partly by results of the analysis of the A  
478 group) is described fully in results below. Clearly many schemes are possible for a weighted sum

479 of seven variables, and we report correlations among outcomes from different schemes. Finally,  
480 many of the B group species had some data from the NABA dataset that were not sufficient for  
481 inclusion in our main model and occupancy forecasts. For those species, we ran a less complex  
482 model (described above as the secondary set of NABA models) and report the results along with  
483 other B group results, but we do not incorporate those values into the B group risk index to  
484 maintain consistency in risk index calculations.

485 The calculation of the risk index for both the A and B groups relied on a complete data  
486 matrix. For most of the variables used for the B group, there were no missing values, specifically  
487 for all of the variables deriving in part from the expert geographic ranges: range area, voltinism,  
488 precipitation, development, and climate departure (Figure 1). A few species lacked data for host  
489 range, and these we filled with interpolation of the median value calculated across all species. A  
490 more consequential decision was to similarly use median interpolation with the observation data  
491 and the A group species. In other words, a species without sufficient iNaturalist observations for  
492 analysis was given the median value associated with that variable prior to the calculation of the  
493 risk index. The same was true for species not represented in the NABA or Shapiro data: lacking  
494 any other information we assume those species are simply following the central tendency (for  
495 historical and projected change) as estimated across other species.

496

### 497 **Risk index for subspecies**

498 A list of subspecies present in the western United States (Arizona, California, Colorado, Idaho,  
499 Montana, New Mexico, Nevada, Oregon, Utah, Washington, and Wyoming) was gathered from  
500 Pelham (2022). Geographic inclusion for subspecies was based on described ranges in original  
501 descriptions and records from public databases (n = 1,004 subspecies). Two categories of

502 conservation need were considered in ranking subspecies: 1) global, national, and subnational  
503 (state) ranks assigned by the organization NatureServe; and 2) the last year a subspecies had a  
504 publicly available recorded observation based on our inspection of available databases.

505 A full description of NatureServe ranking methods and rank descriptions is available in  
506 Faber-Langendoen et al. (2012). Briefly, ranks are assigned a 1-5 number where 1 is Critically  
507 Imperiled, 2 is Imperiled, 3 is Vulnerable, 4 is Apparently Secure, and 5 is Secure. Rankings are  
508 assessed using a Rank Calculator that includes aspects of rarity, threats, and population trends.  
509 Ranks are used to assess imperilment over the entire (global) range of subspecies as well as at  
510 the national and state levels. For subspecies, global rankings are indicated by a “T” rank  
511 following the global rank. Thus, an Imperiled subspecies (rank of 2) of an Apparently Secure  
512 species (rank of 4) would have the rank G4T2. National (“N”) and state (“S”) rankings are  
513 assessed separately for species and subspecies. Additional ranks are “X” for taxa that are  
514 presumed extirpated, “H” if a taxon is possibly extirpated with records in the last 20-40 years  
515 and might be rediscovered, as well as others including "NR" for taxa that have not yet been  
516 assessed (Faber-Langendoen et al. 2012).

517 First, we created a summary measure of subspecies imperilment at various geographic  
518 scales based on the NatureServe evaluations by creating a quantitative scale for global, national,  
519 and state rankings. Points increased with imperilment, such that a rank of G1 is worth 4 points  
520 and G5 is worth 0 points. This scoring was completed similarly for the nominate species global  
521 ("G") ranks, global subspecies (“T”) ranks, national (“N”) ranks, and each state with a S1-S5  
522 ranking. State scores for each species were averaged to create a single state-level score. Any  
523 other rankings including "X" and "H" were scored as a 0 as these are equally uninformative with

524 respect to realized conservation need. A total score for each taxon was calculated as the sum of  
525 the global, national, and state scores such that a taxon could have a score from 0-16.

526         Second, the most recent year of observation for each subspecies was collected from  
527 various accessible databases, websites, photographic collections, and peer-reviewed literature,  
528 with a goal of finding one observation for a taxon from 2001 or more recent as evidence of  
529 recent presence. Searches began with all specimen records by family in the Symbiota Collections  
530 of Arthropods Network for the 11 western states (SCAN 2022). For any taxon that did not have a  
531 post-2001 observation, progressive searches through the literature were made until one was  
532 found or until all references had been searched for the most recent record available; a full list of  
533 resources used is available Table S1. Any taxon with a record from 2001 or more recent received  
534 a score of 0, and each year previous to this increased the score by 1 point. Scores for this  
535 category ranged from 0 to 34 (for *Megathymus yuccae harbisoni*). While we have done our best  
536 to collect available observations, identification to the subspecies level was challenging at times  
537 due to either recent taxonomic changes or difficulty identifying individuals using only  
538 photographs. We do not believe these issues significantly affect our overall ranking of  
539 subspecies.

540         As with the species-level risk assessment, subspecies values for each of the three  
541 categories were normalized to be between 0 and 1 before the calculation of a composite index.  
542 The NatureServe score was given 75% weight towards a total score as it includes the most  
543 information regarding total threat or risk, and the year of observation scores were given 25%  
544 weight. Weighted scores for the two categories were added together to create a single  
545 comprehensive score for each subspecies between 0 and 1. Those scores were used to rank the  
546 subspecies, and we also asked if subspecies risk values were correlated with risk calculated



547 independently at the species level (calculations described in previous section). For species with  
548 multiple subspecies evaluated for risk, the subspecies values were averaged (within each nominal  
549 taxon), and then a simple Pearson correlation was calculated between the two sets of risk values  
550 (at the species and subspecies level).

551

## 552 **Geographic and Phylogenetic visualization of risk**

553 Finally, we asked how the composite risk indices were distributed across the landscape and  
554 across the phylogeny of western butterflies. From a spatial perspective, we calculated both  
555 species richness (separately for each cell in a raster covering the extent of the eleven western  
556 states) and average risk among species present in a cell. We did this separately for the A and B  
557 group species, and we restricted analyses to only species with higher risk values by subsetting to  
558 the upper 75th quantile of risk values separately for each list (A and B). Within those higher-risk  
559 groups, we converted each species range map from a spatial polygon to a raster layer where  
560 values within the range were set to 1 and values outside the range to 0. We summed these values  
561 across all rasters to produce a new raster of species richness. To calculate mean risk for each cell,  
562 we divided the cumulative risk index raster by the species richness raster.

563 For the evolutionary perspective, we used the phylogeny from Zhang et al. (2019) for all  
564 845 butterfly species from the United States and Canada. Briefly, this tree was based on 756  
565 universal single-copy orthologs we identified from 36 reference genomes using OrthoMCL (Li  
566 et al. 2003). Sequences of these orthologs were aligned using both local (BLAST [Altschul et al.  
567 1997] ) and global (MAFFT [Kato et al. 2002] ) alignment methods, and only positions that  
568 were consistently aligned by both methods were used. Sequences of non-reference species were  
569 derived by mapping the Illumina reads to the exon sequences of the reference species and

570 performing reference-guided assembly. Multiple sequence alignments (MSA) of different  
571 orthologs were concatenated to a single MSA. This MSA was partitioned by codon position and  
572 used to build a tree by IQ-TREE (version 1.6.12) (Nguyen et al. 2015) with the most suited  
573 evolutionary model automatically found by IQ-TREE.

574 The phylogeny was imported as a time-calibrated .tre file into R and pruned to our focal  
575 western butterflies (the combined A and B group lists). The package `ggtree` (Yu et al. 2017)  
576 was used to plot a phylogeny with tips labelled by risk categories assigned based on the quantiles  
577 of the risk distributions separately for the A and B group species. Specifically, species in the  
578 upper 90th quantile were labelled as "high risk," species between the 75th and 90th quantiles  
579 were labelled as "medium risk", and species below the 75th were "low risk." Finally, the  
580 `phylosig` function from `phytools` (Revell 2012) was used to calculate lambda and K (with  
581 1000 simulations for the permutation test) as measures of phylogenetic signal for the continuous  
582 risk index across all species, which in this context is informative with respect to the extent to  
583 which closely related species share similar levels of risk.

584

## 585 **RESULTS**

586 We calculated an index of risk for 396 species, which includes two groups: 184 species in the A  
587 group with extensive monitoring or observational data, and 212 species in the B group without  
588 observational data (or without enough to be used in our primary population models). Not  
589 surprisingly, the B group species tend to have smaller geographic ranges (Figure 2a), which in  
590 part explains their reduced presence (just by geographic chance) in monitoring groups, but the  
591 two groups differ in other ways (Figure 2). The B group species have slightly lower exposure to  
592 development (Figure 2b) and moderately higher exposure to climate change (Figure 2c). The

593 higher climate change exposure is explained in part by the greater presence of more southern  
594 species in the B group, as seen by latitudinal midpoints (Figure 2g) and qualitative  
595 characterization of range (Figure 2h).

596 For the A group species, we modeled historical and projected population trajectories  
597 using different sources of observational data. Consistent with previous work with NABA data,  
598 our new model with shared (across-species) observation heterogeneity found a majority of  
599 species (71%) with annual growth rates below replacement (Figure S4). We used those estimated  
600 annual growth rates and the most recent year of observed counts to simulate 50 years into the  
601 future. The median fraction of extant locations (or probability of local persistence) per species at  
602 50 years was 0.60, and that fraction was positively related to historical population growth rates  
603 (Figure S4). Results from analyses of Shapiro data also find a majority of species with downward  
604 trends through time of varying magnitude (84.5% of species have negative year coefficients). We  
605 combined the 50-year persistence estimates (from the NABA model) with historical rates of  
606 change (from the Shapiro data) and an estimate of shift in range size based on community  
607 scientist observations (from iNaturalist) relative to expert range sizes to generate a composite  
608 risk index for the A group species. Note that the A group species are shown in Figure 3 with risk  
609 information associated with the other seven variables (geographic range, exposure to  
610 development, etc.), even though the actual ranking of the A group is based solely on the  
611 observational data (NABA, Shapiro, iNaturalist). We present the information in this way because  
612 we acknowledge the imperfect geographic coverage of monitoring programs and the inherent  
613 uncertainty in population models. Thus, the reader or conservation practitioner can easily see if  
614 two species with similar risk values in the A group (based on NABA, Shapiro and iNaturalist  
615 results) potentially have similar risk based on other variables like range size. We also generated

616 the risk values with an even split in weights between NABA and Shapiro data (leaving out  
617 iNaturalist), and found that the resulting risk values were correlated with our primary risk values  
618 at  $r = 0.997$  (which reflects primarily the low weight assigned to iNaturalist observations but also  
619 the fact that they are correlated with results from Shapiro data, Figure S5).

620 Without observational data, the ranking of B group species required a partitioning of  
621 weights among the other lines of information. To partly inform that process, we used the A group  
622 species to estimate the effects of other variables on risk index (based on NABA, Shapiro, and  
623 iNaturalist data). The model explained a relatively small proportion of variance in the risk index  
624 (Table S2), but did demonstrate that smaller wingspans (99% probability of effect) and lower  
625 range-wide precipitation (86% probability of effect) are associated with risk for the A group  
626 species. In addition, we also suspected climate change would be important based on our previous  
627 work with western butterflies (Forister et al. 2021, Halsch et al. 2021). This is especially true  
628 given the large presence of B group species with ranges in the desert southwest (Figure 2h), a  
629 region heavily impacted by warming and drying trends. We adopted the following weighting  
630 scheme to calculate a single risk value for each species in the B group: 20% precipitation, 20%  
631 wingspan, 20% climate change, 10% development, 10% range size, 10% voltinism, and 10%  
632 host range; correlations among the seven variables as well as the three observational variables  
633 (for the A group) are shown in Figure S5. As a comparison to that scheme, we also ranked the B  
634 group species with equal weights among the seven variables (14.3%); the resulting risk values  
635 were correlated at  $r = 0.90$  ( $t = 29.32$ ,  $df = 210$ ,  $P < 0.001$ ) with the values from the primary  
636 scheme. With a third weighting scheme based on 50% from each of average range-wide  
637 precipitation and wingspan (the two variables identified by the analyses of A group risk), the  
638 correlation with the main scheme was  $r = 0.55$  ( $t = 9.66$ ,  $df = 210$ ,  $P < 0.001$ ).

639 The top fifty species with the highest risk values from each of the A and B groups are  
640 shown in Figure 3 (the other species with lower risk values are in Figures S6, S7 and S8). For the  
641 highest-ranked A group species, agreement between the two monitoring schemes is apparent  
642 with large "risk circles" in both the NABA and Shapiro columns (Figure 3a). In some cases,  
643 these top-ranked A group species have also been seen less frequently over the last 15 years  
644 relative to expectation based on the expert-derived range maps (see the iNaturalist column in  
645 Figure 3a). Time series plots for two of those top species are shown in Figure 4 (*Vanessa*  
646 *annabella*) and Figure 5 (*Euchloe ausonides*); in Figure 6, neutral or upward trajectories can be  
647 seen for *Poanes melane*, the species with the lowest risk index among the A group species  
648 (Figure S8). Similar plots for all other A group species are available through an online tool (see  
649 supplementary material). The rankings for the A group species are shown with 85% credible  
650 intervals (Figure 2a), which are broad; this uncertainty reflects the high inter-annual variability  
651 inherent to the time series data being modelled (from both NABA and Shapiro) and should be  
652 kept in mind when interpreting the position of species on the A group list.

653 We compiled data for 1,004 subspecies, and ranked them using criteria that were largely  
654 based on NatureServe ratings, but also included the last year in which an observation was  
655 reported for a particular taxon. The 50 subspecies with the highest priority for conservation are  
656 shown in Table 1, where the high frequency of butterflies in the family Lycaenidae is notable,  
657 with almost half (22 out of 50) in the top 50 list in that family. Another 15 taxa are in the  
658 Nymphalidae family, 8 of which are subspecies of *Speyeria* [*Argynnis*], a charismatic group of  
659 subspecifically diverse species. It is interesting to note that the split between A and B group  
660 species in the top 50 subspecies list is 31 A group and 19 B group, which at least suggests that  
661 the evaluation of subspecies is not necessarily biased towards species with the smallest ranges

662 (which tend to be the B group species; Figure 2a). Additional information on the 1,004  
663 subspecies that we evaluated is available in archived data for this project (see data availability  
664 statement), and in an online tool where output similar to Table 1 can be filtered by state and by  
665 family (see supplementary material).

666 We also asked if the risk index calculated at the subspecies level could be predicted by  
667 the risk index calculated at the species level (Figure 3). An overall correlation was detected  
668 between the two indices at  $r = 0.17$  ( $t = 2.05$ ,  $df = 140$ ,  $P = 0.04$ ), and the relationship was driven  
669 by the B group species. With the data split into the A and B groups, a correlation was not  
670 detected for the former ( $r = 0.10$ ,  $t = 0.95$ ,  $df = 99$ ,  $P = 0.34$ ) but was for the latter: for the  
671 species without monitoring data (the B group) the risk index calculated at the species level is  
672 correlated at  $r = 0.28$  ( $t = 2.15$ ,  $df = 55$ ,  $P = 0.0036$ ) with the risk index at the subspecies level.

673 Finally, we examined the distribution of the species-level risk index geographically and  
674 phylogenetically. Considering the species with the highest risk index values (above the 75th  
675 quantile of risk values) for the A group, across the 11 western states the spread of average risk  
676 shows a partially inverted relationship with richness of the most at-risk species in some parts of  
677 the region (Figure 7). For example, average risk is high in the northern Central Valley of  
678 California and in the northwestern region of Oregon (Figure 7a), while total richness of at-risk  
679 species is lower in those areas (Figure 7b). Similarly, richness of at-risk species is high in the  
680 Sierra Nevada, but average risk is low. The distributions of risk for the B group species highlight  
681 the bias of that group towards the most southern areas, with high average risk along the southern  
682 California coast (Figure 7c) and a concentration of at-risk species along the border between  
683 Mexico and New Mexico (Figure 7d).

684 The phylogenetic picture of risk shows multiple clusters of at-risk species, and some  
685 lineages with notably lower risk, like the Papilionidae and much of the Nymphalidae (Figure 8).  
686 The families sharing the disproportionate amount of risk are the Hesperidae (with 16% of  
687 species in the high risk category, above the 90th quantile of risk) and the Lycaenidae (with 14%  
688 of species at high risk); these are followed by the Riodinidae (with 13% of species at high risk,  
689 albeit based on a small sample size with the family represented by only 8 species) and the  
690 Pieridae (with 12% of species at high risk). The percentages of high risk species in the  
691 Papilionidae and Nymphalidae are just 8% and 1%, respectively (Figure 8). Tests of  
692 phylogenetic inertia are consistent with the observation of phylogenetically clustered risk  
693 (Pagel's  $\lambda = 0.39$ ,  $P < 0.001$ ; Blomberg's  $K = 0.052$ ,  $P = 0.001$  based on 1k randomizations).

694

## 695 **DISCUSSION**

696 Our primary goal in this paper has not been to document butterfly declines or to identify traits  
697 that make insects more or less sensitive to the stressors of the Anthropocene, as these topics have  
698 been addressed elsewhere for North America (Schultz et al. 2019, Wepprich et al. 2019, Crossley  
699 et al. 2021, Forister et al. 2021), the Neotropics (Janzen and Hallwachs 2019, Salcido et al.  
700 2020), and numerous other parts of the world (Nakamura 2011, Fox 2013, Wagner 2019).  
701 Instead, our goal has been to organize and analyze heterogenous data sources in a way that  
702 allows conservation biologists to identify the butterflies in the 11 western US states that are most  
703 likely to suffer serious reductions in range or population size in coming years. We hope that our  
704 work advances the issue of the prioritizing of species for conservation given mixed data types,  
705 uneven spatial coverage and uncertainty in historical trends. Although some parts of the world

706 (notably countries in western Europe) have dense coverage with standardized monitoring,  
707 prioritization in most of the world will involve some mix of monitoring and trait-based inference.

708 The western states have been our region of study, rather than the entire US, because the  
709 impacts of climate change are severe and distinct in this arid region (Gonzalez et al. 2018), and  
710 the butterfly fauna is similarly shaped by a unique topography and climatic history (Shapiro  
711 1996, Hawkins 2010). At the continental scale, butterflies in the west also appear to be  
712 experiencing the most severe declines (Crossley et al. 2021). As a consequence of expansive  
713 areas with low human population density, about half of the butterfly species in the region are not  
714 included in the monitoring datasets used here, yet we have brought together information on the  
715 entire fauna (with the exception of a few species with rare occurrences, mostly strays across the  
716 US-Mexico border). Because of this, our study has an apples-and-oranges structure (species with  
717 and without monitoring data) that extends to the interpretation of the risk index values and  
718 engenders certain ironies. Chief among the ironies of our work is the fact that we rank B group  
719 species in part by certain variables (geographic range, exposure to climate change, etc.) that are  
720 not evidently associated with declines in the species for which we have historical records (the A  
721 group). In other words, considering Figure 3, the A group species near the top of the list do not  
722 necessarily have the smallest ranges, and the same can be said of other variables. Even for the  
723 two variables (wingspan and average precipitation) which do predict risk in the A group, the  
724 variance explained is low (Table S2) yet we still emphasize these variables in ranking the B  
725 group species. We discuss these apparently counterintuitive decisions below, and then discuss  
726 phylogenetic and geographic hotspots of risk. Finally, we end with a consideration of individual  
727 taxa most deserving of attention given available evidence.



728           Among the complexities of variables potentially associated with risk, an understanding of  
729 geographic range starts by noting that the A group species have broader geographic ranges  
730 (Figure 2a), which is indeed why they are present at enough NABA sites to be included in our  
731 core population model. Thus the fact that many of the most severely declining species are  
732 widespread (e.g., *Vanessa annabella* in all 11 states) does not diminish the logic of prioritizing B  
733 group species based in part on small range size, which is a well-known determinant of risk  
734 (Stauder et al. 2020). Similarly, the effects of voltinism and ecological host specialization are  
735 relatively straightforward: everything else being equal, we expect a species with multiple  
736 generations per year and an ability to utilize many hosts to be more resilient (to any number of  
737 stressors) than another species without those traits (Eskildsen et al. 2015).

738           The interpretation of other variables is less straightforward, chief among them being  
739 exposure to climate change. Previous work with western butterflies has identified warming and  
740 drying conditions as stressors, based in particular on analyses of geographic variation among  
741 study sites in climate change effects and changes in aggregate butterfly density (Forister et al.  
742 2021). At the species level (rather than the level of individual study sites), the same signal is not  
743 as apparent in the present study for the A group species (in other words, the species towards the  
744 top of the A group list do not have particularly high exposures to climate change). This is  
745 because most of these species have large enough ranges that their exposure to climate change  
746 (when quantified across the entire range) includes areas with both more and less severe warming  
747 and drying that tend to cancel each other out at the scale of broadly-distributed species.  
748 However, the B group species have smaller and more southern ranges (Figure 2), which is the  
749 part of the west most impacted by climate change (Gonzalez et al. 2018). Thus, we believe

750 exposure to climate change is well justified as a contributing factor to risk specifically for these  
751 species for which we lack monitoring data.

752 Exposure to development (urban, suburban and agricultural lands) requires similarly  
753 careful interpretation. This is chiefly because the data most well suited to understanding the  
754 effects of habitat destruction on insects will rarely be collected: places that have already been  
755 developed will not be monitored, and existing monitoring efforts will often be located in more  
756 pristine locations even when relatively proximate to human habitation. The Shapiro dataset is an  
757 exception, as it encompasses a severe land use gradient from the agricultural and urban Central  
758 Valley to the undeveloped high elevations of the Sierra Nevada. From that program, we know  
759 that land conversion and contamination (with pesticides) have effects of similar magnitude at  
760 low elevations (Forister et al. 2016). Though similar information does not exist across the west,  
761 we included exposure to development in our rankings here for the B group species for the simple  
762 reason that common sense suggests that a range that encompasses more development is likely to  
763 experience increasing fragmentation and contamination in coming years relative to a species with  
764 less exposure.

765 Geographic projections of risk for B group species emphasize the southern areas of the  
766 west (Figure 7), but also point to specific hotspots of average risk that include the southern  
767 California coast. Like A group species in the Central Valley of California, that coastal region has  
768 low richness of B group species, but on average the species that are there in the vicinity of the  
769 Los Angeles basin score high for our risk factors. Arizona and southwestern New Mexico have a  
770 high concentration of B group species with high risk factors, thus this area should be prioritized  
771 for future monitoring efforts. For A group species, the Sierra Nevada Mountains (especially the  
772 northern Sierra), the Colorado Plateau and the southern Rocky Mountains are hotspots of

773 declining species (Figure 7). These same places have been recently identified as hotspots of  
774 imperiled species in analyses that included plants, vertebrates, freshwater invertebrates and some  
775 terrestrial insects (Hamilton et al. 2022). For both A and B group species, iNaturalist records  
776 (and other distributed, community-scientist platforms such as eButterfly) hold great promise for  
777 understanding population trajectories in coming years.

778 We have used iNaturalist records to ask if species have been seen across smaller or larger  
779 areas relative to expectation based on the areal extent of expert derived range estimates. We  
780 consider that approach to be exploratory and gave it a corresponding low weight in our ranking.  
781 Although we used research grade observations from iNaturalist (Hochmair et al. 2020),  
782 misidentifications are still possible and (more generally) complexities in taxonomic usage and  
783 metadata associated with GBIF (the Global Biodiversity Information Facility from which we  
784 accessed the records) produce challenges when merging with other datasets. We have been  
785 conservative in our vetting of that process but acknowledge that tool development in this area is  
786 needed, and we offer our results in the hope of encouraging other researchers to explore creative  
787 uses of iNaturalist and other publicly-sourced records. Despite the potential issues, we note that  
788 the variable for change in range size that we derived from the iNaturalist-to-expert comparison  
789 was positively correlated ( $r = 0.21$ ) with historical trajectories derived from Shapiro data (Figure  
790 S5) but not with 50-year projections based on NABA data ( $r = 0.04$ ).

791 Phylogenetically, risk values are strongly clustered within and among families, with  
792 notable concentrations in the Lycaenidae and Hesperidae, with the latter in part due to both  
793 species with small southern ranges (B group species) and species in monitoring programs with  
794 observed declines. Of the high-risk category species (with risk index values above the 90th  
795 quantile), 53% are Hesperidae. The family Nymphalidae has the lowest concentration of at-risk

796 species, although one of the most notably-declining species is in this family. Despite being large  
797 and dispersive and able to use a number of exotic plants as larval hosts, *Vanessa annabella* is  
798 becoming hard to find across locations that include urban centers, high mountains, and southern  
799 deserts (Figure 4).

800         Although *V. annabella* is deservedly at the top of the risk list (Figures 3 - 4), we stress the  
801 uncertainty in the actual risk values that we have generated and we do not place much weight on  
802 the exact position of species on that list. In other words, we believe that the top species in the A  
803 group are indeed in historical declines that will likely continue in coming years, but the fact that  
804 one species is in the 4th position vs the 10th or even the 25th position on the list is not  
805 necessarily important. Small differences in, for example, the projected 50-year probability of  
806 population persistence affect the positions for those top species which have mostly similar risk  
807 values (and broadly overlapping credible intervals). This is why we conservatively suggest that  
808 all of the top 50 species in the A group (Figure 3) deserve closer scrutiny and in some cases  
809 likely deserve protection. The fact that rankings should be treated as approximate is also why we  
810 have presented other lines of information (geographic range, host specialization, etc.) for the A  
811 group, even though the risk index ranking is based solely on the observational data (NABA,  
812 Shapiro and iNaturalist) for those species. For example, *Pontia protodice* and *Lycaena*  
813 *xanthoides* have nearly identical risk indices, but the latter (*L. xanthoides*) is univoltine with a  
814 smaller geographic range, greater exposure to development and a more specialized diet (Figure  
815 3); these are all factors that could be considered by conservation biologists and ecologists  
816 interested in declining insects. With respect to current protections, only two of the species that  
817 we have studied have status at the federal level: one of the A group species (the monarch  
818 butterfly, *Danaus plexippus*) is currently a candidate for protection under the US Endangered

819 Species Act (ESA), and one of the B group species, *Lycaena hermes*, is currently listed as  
820 threatened. Note that *Boloria acrocneuma* is treated as a full species under the ESA, but we have  
821 followed both NABA (2018) and Pelham (2022) in counting it among the protected subspecies  
822 (*Boloria improba acrocneuma*) in Table 1.

823 Our presentation of the top 50 species in the A group (Figure 3) includes sample sizes  
824 (for NABA and Shapiro datasets) which should also be considered when judging the evidence  
825 for risk. For example, the 2nd and 3rd species on the A group list (Figure 3) are represented by  
826 data from 3 or fewer sites for the NABA and Shapiro datasets, and are not represented in  
827 iNaturalist analyses. The small samples for those species are reflected in broad intervals around  
828 the risk values, and it can be noted that other species in the top 10 for the A list are known to be  
829 in decline based on evidence from two to three times as many sites (e.g., *Pholisora catullus*,  
830 *Atalopedes campestris*, and *Euchloe ausonides*). The number of sites for individual species is a  
831 reflection not just of information available for analysis, but it should be remembered that risk  
832 associated with the NABA data derives from a multi-species population viability analysis, and  
833 species with fewer sites are more likely by chance to have lower occupancy in forecasts than  
834 species known from a greater number of sites. This is both a methodological feature of stochastic  
835 simulations but also reflects a biological reality in that more widespread species are known from  
836 a greater number of NABA sites (thus geographic range is indirectly involved in the contribution  
837 that the NABA analyses make to our estimate of risk).

838 Yet another important aspect of sample size involves the great many A group species not  
839 represented in all three of the observational datasets (Shapiro, NABA and iNaturalist); for these  
840 species, we used median interpolation. In other words, when calculating the risk index for a  
841 species present in, for example, the Shapiro and iNaturalist datasets but not NABA, we assigned

842 a 50-year projection value based on the median across all other species represented in the NABA  
843 dataset. For the present effort, we consider this to be at least a relatively simple assumption,  
844 although we acknowledge that future analyses could use more sophisticated interpolation  
845 perhaps including information from closely related species. The phylogenetic signal observed  
846 here suggests that genetic relatedness could be a tool for dealing with uncertainty and missing  
847 data in conservation ranking.

848         The weight of missing data and uncertainty of course becomes greater when we turn to  
849 the top 50 species in the B group (Figure 3) for which monitoring data is either absent or  
850 insufficient for robust models. Not only is robust observational data lacking, but so many of the  
851 B group species are similar in having small ranges in hot and dry parts of the region that the  
852 overall spread of risk values is smaller than for the A group. Thus, rankings in the top 50 for the  
853 B group should be taken with an even more substantial serving of salt. Indeed, there are certainly  
854 species beyond the top 50 that merit careful scrutiny. For example, *Strymon avalona* is restricted  
855 entirely to Catalina Island (less than 200 square kilometers) off the coast of southern California.  
856 The partly wild nature of the island gives the species a low development score and the area  
857 happens to be characterized by only moderate departure from climatic baseline. Thus *S. avalona*  
858 ranks outside of the top 50 for the B group (Figure S6), even though that small geographic range  
859 of course puts it at risk of stochastic loss. Similarly, many of the B group species below the top  
860 50 have red lambda symbols (to the right of the panel) which indicate negative annual trends  
861 (Figures S6-S8), albeit based on very few NABA sites (which is why we have shown those  
862 results but did not use them in the calculation of the B group risk index). In general we hope that  
863 the data organized here for the B group species is an inspiration for greater monitoring of these

864 taxa with small ranges in regions vulnerable to threats that include ongoing climate change and  
865 the loss of natural disturbance regimes (Haddad 2018).

866 Even greater uncertainty underlies the prioritization of subspecies for conservation,  
867 which we have done using a composite of rankings published elsewhere (NatureServe) and a  
868 survey of the last year of a publicly reported observation. Despite the uncertainty and different  
869 approaches involved in ranking species and subspecies, it is noteworthy that the subspecific risk  
870 values are correlated ( $r = 0.28$ ) with risk values for the associated B group species. Not  
871 surprisingly given their well-known propensity for subspecific differentiation and localized  
872 population dynamics, 44% of the top 50 subspecies (Table 1) are in the family Lycaenidae. Our  
873 ranking of subspecies also highlights two states with high numbers of at risk subspecies. First, 25  
874 of the top 50 taxa have a range that includes California, reflecting the long-standing risks to  
875 butterfly populations and endemic subspecies from various types of habitat loss and degradation  
876 in that state (Forister et al. 2016). Second, 21 of the top 50 taxa have a range that includes  
877 Nevada, a region of high subspecific diversity and endemism for many butterfly species across  
878 families. In particular, the extreme subspecific diversity of *Euphilotes* species in the western US  
879 is apparent and should be a target for future investigation with resurveys, conservation genetics  
880 and targeted monitoring; more than 50 *Euphilotes* subspecies are listed in Pelham (2022).

881 Finally, we can also note that several subspecies in our top list are either protected  
882 federally or currently in review for protection under the US Endangered Species Act, but those  
883 are intermixed with many taxa in the top 50, and especially the top 25, not receiving federal  
884 conservation attention. In addition, while some state agencies in the west manage proactive  
885 conservation efforts that prevent species from needing federal protection (e.g., through a list of  
886 Species of Greatest Conservation Need [FWS 2001]), other state wildlife agencies do not have

887 regulatory authority over terrestrial invertebrates. Perhaps our most important finding for  
888 subspecies is not reflected in Table 1: of the more than 1k taxa that we reviewed, approximately  
889 400 are not included in NatureServe assessments. Thus the need for broader evaluation is great,  
890 and is also urgent as there are many examples of subspecies that have not been seen in many  
891 years; these include *Philotiella speciosa bohartorum* with no sightings since the 1970s despite  
892 extensive searches (Davenport 2007), *Plebejus [Icaricia] saepiolus aureolus* presumed extinct  
893 from development, and *Euchloe ausonides andrewsi*, threatened by fires and drought and with its  
894 last available observation from 1983 (Davenport 2018, SCAN 2022).

895

## 896 **CAVEATS & CONCLUSIONS**

897 Our synthesis of status and trends for a diverse fauna faced many challenges. Chief among these  
898 is the fact that even for species that are relatively well represented in monitoring schemes, the  
899 information is still clustered around areas of human population density. Thus, broad ranges (e.g.,  
900 Figure 4) and more narrow ranges (e.g., Figure 6) alike are not particularly well sampled in terms  
901 of spread of monitored locations in space. We can hope that coming years will see greater  
902 investment in monitoring and participation by the general public, and we hope that our use of  
903 iNaturalist data in particular encourages both increasing contributions by the general public and  
904 the development of new models that can take advantage of mixed data types (e.g, Strebel et al.  
905 2022). Another major data issue that we faced was at the US-Mexico border; although ranges are  
906 more recently available for species in Mexico (Glassberg 2018), we have limited our studies for  
907 now to north of the border (and south of the Canadian border). We did this partly because of our  
908 previous focus on butterflies of the 11 western US states (Forister et al. 2021), but also because  
909 one has to bite off a manageable problem which in this case involved stopping at political



910 borders. We note, however, that the political border especially in the south created many  
911 apparently small ranges for those species just crossing that line. Most seriously, those very small  
912 ranges are subject to stochasticity in our assessment of exposure to development because a pixel  
913 of development can by chance be included or not in small ranges and thus have an outsized  
914 influence (in terms of the fraction of the range exposed to development). Better integration of  
915 data across southern and northern US borders is an important area for future work, especially  
916 since threats involving development or pesticide use could be different in different countries. In  
917 the meantime, it is for these reasons that we have included our qualitative range labels (N, S, E,  
918 and W) with our rankings (Figure 3). For the B group species in particular, those labels can be  
919 used to focus on western species where the political boundaries are considerably less of an issue.

920         The traditional focus for butterfly conservation in the United States has been at the  
921 taxonomic level of subspecies, which is partly a consequence of the fact that population  
922 segments cannot be listed for invertebrates (thus leaving subspecies as the next unit below full  
923 species that can be protected). We have organized subspecific information and present a list of  
924 subspecies that could be profitable targets of conservation attention (Table 1), though most of  
925 our effort has been at the level of full species. Thus, we acknowledge that our results fall partly  
926 outside of the traditional scope of conservation work for butterflies in the United States. It is,  
927 however, entirely likely that compounding population losses across the wild spaces of the region  
928 have pushed many full species to the point where range-wide research and conservation attention  
929 are warranted. A notable example of this is recent effort focused on conservation of the monarch  
930 butterfly, *Danaus plexippus* (Pelton et al. 2019), which is indeed in our list of the 50 most at-risk  
931 species (Figure 3), but a number of species are higher on the list and are equally deserving of  
932 attention. It is our chief hope that the work presented here is a framework that will facilitate

933 such work in coming decades, acknowledging the many assumptions that have been made along  
934 the way.

935

## 936 **ACKNOWLEDGEMENTS**

937 MLF thanks the National Science Foundation (DEB-2114793), and CAH was supported by a  
938 National Institute of Food and Agriculture fellowship (NEVW-2021-09427). EMG, KLB, and  
939 JPJ were supported by the Modelscape Consortium with funding from NSF (OIA-2019528).  
940 Thanks to the Plant Insect Group at UNR for much thoughtful feedback, and Lee Dyer in  
941 particular for various key ideas, as well as Sarina Jepsen who provided important feedback on  
942 subspecies risk. We thank Texas State University for the use of the LEAP computing cluster,  
943 and thanks also to authors of our previous analysis of western butterflies (Forister et al. 2021)  
944 without which the current paper would not have gotten off the ground.

945

## 946 **CONFLICT OF INTEREST**

947 The authors declare no conflict of interest.

948

## 949 **AUTHOR CONTRIBUTIONS**

950 MLF conceived the project and the overall organization of data and the presentation of results.  
951 TVR wrote the Bayesian population models for the NABA data and contributed to the design of  
952 analyses. EMG contributed to numerous components, especially the analysis of spatial data. KJB  
953 organized information on subspecies. CAH, CFC, KLB, and TB contributed to component  
954 analyses and assisted with data collation or organization. JZ, QC, and NVG generated the  
955 phylogeny which was analyzed here by JPJ. JG manages the collection of NABA data and

956 contributed the expert-derived range outlines. AMS has collected the vast majority of the Shapiro  
957 transect data (with a few recent years of collection contributed in part by MLF and CAH). All  
958 authors contributed to interpretation of results and writing of the manuscript.

959

## 960 **DATA AVAILABILITY STATEMENT**

961 Data and code will be made available through Dryad at the time the manuscript is accepted for  
962 publication.

963

## 964 **REFERENCES**

965 Abatzoglou, J. T., S. Z. Dobrowski, and S. A. Parks. 2020. Multivariate climate departures have  
966 outpaced univariate changes across global lands. *Scientific Reports* 10:1–9.

967 Abatzoglou, J. T., S. Z. Dobrowski, S. A. Parks, and K. C. Hegewisch. 2018. TerraClimate, a  
968 high-resolution global dataset of monthly climate and climatic water balance from 1958–  
969 2015. *Scientific Data* 5:170191.

970 Altschul, S. F., T. L. Madden, A. A. Schäffer, J. Zhang, Z. Zhang, W. Miller, and D. J. Lipman.  
971 1997. Gapped BLAST and PSI-BLAST: a new generation of protein database search  
972 programs. *Nucleic acids research* 25:3389–3402.

973 Benton, T. G. 2003. Understanding the ecology of extinction: are we close to the critical  
974 threshold? *Annales Zoologici Fennici* 40:71–80.

975 Bonelli, S., L. P. Casacci, F. Barbero, C. Cerrato, L. Dapporto, V. Sbordoni, S. Scalercio, A.  
976 Zilli, A. Battistoni, and C. Teofili. 2018. The first red list of Italian butterflies. *Insect*  
977 *Conservation and Diversity* 11:506–521.

978 Brook, B. W., N. S. Sodhi, and C. J. A. Bradshaw. 2008. Synergies among extinction drivers

- 979 under global change. *Trends in Ecology & Evolution* 23:453–460.
- 980 Cardoso, P., P. S. Barton, K. Birkhofer, F. Chichorro, C. Deacon, T. Fartmann, C. S. Fukushima,  
981 R. Gaigher, J. C. Habel, and C. A. Hallmann. 2020. Scientists’ warning to humanity on  
982 insect extinctions. *Biological Conservation* 242:108426.
- 983 Cardoso, P., T. L. Erwin, P. A. V Borges, and T. R. New. 2011. The seven impediments in  
984 invertebrate conservation and how to overcome them. *Biological Conservation* 144:2647–  
985 2655.
- 986 Casner, K., M. L. Forister, K. Ram, and A. M. Shapiro. 2014a. The utility of repeated presence-  
987 absence data as a surrogate for counts: a case study using butterflies. *Ecological*  
988 *Applications* 18:13–27.
- 989 Casner, K. L., M. L. Forister, J. M. O’Brien, J. H. Thorne, D. P. Waetjen, and A. M. Shapiro.  
990 2014b. Loss of agricultural land and a changing climate contribute to decline of an urban  
991 butterfly fauna. *Conservation Biology* 28:773–782.
- 992 Crossley, M. S., A. R. Meier, E. M. Baldwin, L. L. Berry, L. C. Crenshaw, G. L. Hartman, D.  
993 Lagos-Kutz, D. H. Nichols, K. Patel, and S. Varriano. 2020. No net insect abundance and  
994 diversity declines across US Long Term Ecological Research sites. *Nature Ecology &*  
995 *Evolution* 4:1368–1367.
- 996 Crossley, M. S., O. M. Smith, L. L. Berry, R. Phillips-Cosio, J. Glassberg, K. M. Holman, J. G.  
997 Holmquest, A. R. Meier, S. A. Varriano, and M. R. McClung. 2021. Recent climate change  
998 is creating hotspots of butterfly increase and decline across North America. *Global Change*  
999 *Biology* 27:2702–2714.
- 1000 Davenport, K. 2007. Yosemite Butterflies. The Taxonomic Report 5.
- 1001 Davenport, K. 2018. Butterflies of southern California in 2018: updating Emmel and Emmel’s

- 1002 1973 Butterflies of southern California. *Lepidoptera of North America* 15. Contributions of  
1003 the CP Gillette Museum of Arthropod Diversity, Colorado State University. Fort Collins,  
1004 CO.
- 1005 Diniz-Filho, J. A. F., P. De Marco Jr, and B. A. Hawkins. 2010. Defying the curse of ignorance:  
1006 perspectives in insect macroecology and conservation biogeography. *Insect Conservation*  
1007 and Diversity 3:172–179.
- 1008 Dirzo, R., H. S. Young, M. Galetti, G. Ceballos, N. J. B. Isaac, and B. Collen. 2014. Defaunation  
1009 in the Anthropocene. *Science* 345:401–406.
- 1010 Edge, D. A., and S. Mecnere. 2015. Butterfly conservation in southern Africa. *Journal of Insect*  
1011 Conservation 19:325–339.
- 1012 Eisenhauer, N., A. Bonn, and C. A Guerra. 2019. Recognizing the quiet extinction of  
1013 invertebrates. *Nature Communications* 10:1–3.
- 1014 Eskildsen, A., L. G. Carvalheiro, W. D. Kissling, J. C. Biesmeijer, O. Schweiger, and T. T.  
1015 Høye. 2015. Ecological specialization matters: long-term trends in butterfly species richness  
1016 and assemblage composition depend on multiple functional traits. *Diversity and*  
1017 *Distributions* 21:792–802.
- 1018 Evans, J. S., and K. Ram. 2021. Package ‘spatialEco.’ R CRAN Project.
- 1019 Faber-Langendoen, D., J. Nichols, L. Master, K. Snow, A. Tomaino, R. Bittman, G. Hammerson,  
1020 B. Heidel, L. Ramsay, and A. Teucher. 2012. NatureServe conservation status assessments:  
1021 methodology for assigning ranks, [https://www.natureserve.org/sites/default/files/](https://www.natureserve.org/sites/default/files/natureserveconservationstatusmethodology_jun12.pdf)  
1022 [natureserveconservationstatusmethodology\\_jun12.pdf](https://www.natureserve.org/sites/default/files/natureserveconservationstatusmethodology_jun12.pdf). NatureServe, Arlington, VA.
- 1023 Farber, O., and R. Kadmon. 2003. Assessment of alternative approaches for bioclimatic  
1024 modeling with special emphasis on the Mahalanobis distance. *Ecological Modelling*

- 1025 160:115–130.
- 1026 Forister, M. L., B. Cousens, J. G. Harrison, K. Anderson, J. H. Thorne, D. Waetjen, C. C. Nice,  
1027 M. De Parsia, M. L. Hladik, and R. Meese. 2016. Increasing neonicotinoid use and the  
1028 declining butterfly fauna of lowland California. *Biology Letters* 12:20160475.
- 1029 Forister, M. L., J. A. Fordyce, C. C. Nice, J. H. Thorne, D. P. Waetjen, and A. M. Shapiro. 2018.  
1030 Impacts of a millennium drought on butterfly faunal dynamics. *Climate Change Responses*  
1031 5:3.
- 1032 Forister, M. L., C. A. Halsch, C. C. Nice, J. A. Fordyce, T. E. Dilts, J. C. Oliver, K. L. Prudic, A.  
1033 M. Shapiro, J. K. Wilson, and J. Glassberg. 2021. Fewer butterflies seen by community  
1034 scientists across the warming and drying landscapes of the American West. *Science*  
1035 371:1042–1045.
- 1036 Forister, M. L., A. C. McCall, N. J. Sanders, J. A. Fordyce, J. H. Thorne, J. O’Brien, D. P.  
1037 Waetjen, and A. M. Shapiro. 2010. Compounded effects of climate change and habitat  
1038 alteration shift patterns of butterfly diversity. *Proceedings of the National Academy of*  
1039 *Sciences of the United States of America* 107:2088–2092.
- 1040 Forister, M. L., and A. M. Shapiro. 2003. Climatic trends and advancing spring flight of  
1041 butterflies in lowland California. *Global Change Biology* 9:1130–1135.
- 1042 Fox, R. 2013. The decline of moths in Great Britain: a review of possible causes. *Insect*  
1043 *Conservation and Diversity* 6:5–19.
- 1044 Fox, R., M. S. Warren, T. M. Brereton, D. B. Roy, and A. Robinson. 2011. A new Red List of  
1045 British butterflies. *Insect Conservation and Diversity* 4:159–172.
- 1046 FWS. 2001. Fish and Wildlife Service, Department of the Interior. 2001. 50 Million FY 2001  
1047 Wildlife Conservation and Restoration Account, 50 Million FY 2001 State Wildlife Grants

- 1048 Program. Federal Register 66:7657–7660.
- 1049 GBIF.org. 2021a. GBIF Occurrence Download (Papilionidae)
- 1050 <https://doi.org/10.15468/dl.m652hd>.
- 1051 GBIF.org. 2021b. GBIF Occurrence Download (Hesperiidae) <https://doi.org/10.15468/dl.dcthdd>.
- 1052 GBIF.org. 2021c. GBIF Occurrence Download (Nymphalidae)
- 1053 <https://doi.org/10.15468/dl.qzgtcr>.
- 1054 GBIF.org. 2021d. GBIF Occurrence Download (Lycaenidae) <https://doi.org/10.15468/dl.2j2ay4>.
- 1055 GBIF.org. 2021e. GBIF Occurrence Download (Pieridae) <https://doi.org/10.15468/dl.vquqtz>.
- 1056 GBIF.org. 2021f. GBIF Occurrence Download (Riodinidae) <https://doi.org/10.15468/dl.bbtkq2>.
- 1057 Geyle, H. M., M. F. Braby, M. Andren, E. P. Beaver, P. Bell, C. Byrne, M. Castles, F. Douglas,
- 1058 R. V Glatz, and B. Haywood. 2021. Butterflies on the brink: identifying the Australian
- 1059 butterflies (Lepidoptera) most at risk of extinction. *Austral Entomology* 60:98–110.
- 1060 Glassberg, J. 2017. *A Swift guide to butterflies of North America*. Princeton University Press.
- 1061 Glassberg, J. 2018. *A Swift guide to butterflies of Mexico and Central America*. Princeton
- 1062 University Press.
- 1063 Gonzalez, P., F. Wang, M. Notaro, D. J. Vimont, and J. W. Williams. 2018. Disproportionate
- 1064 magnitude of climate change in United States national parks. *Environmental Research*
- 1065 *Letters* 13:104001.
- 1066 Goulson, D. 2019. The insect apocalypse, and why it matters. *Current Biology* 29:R967–R971.
- 1067 Haddad, N. M. 2018. Resurrection and resilience of the rarest butterflies. *PLoS Biology*
- 1068 16:e2003488.
- 1069 Hallmann, C. A., M. Sorg, E. Jongejans, H. Siepel, N. Hofland, H. Schwan, W. Stenmans, A.
- 1070 Müller, H. Sumser, T. Hörrén, and others. 2017. More than 75 percent decline over 27 years

- 1071 in total flying insect biomass in protected areas. PLOS ONE 12:e0185809.
- 1072 Halsch, C. A., A. M. Shapiro, J. A. Fordyce, C. C. Nice, J. H. Thorne, D. P. Waetjen, and M. L.  
1073 Forister. 2021. Insects and recent climate change. Proceedings of the National Academy of  
1074 Sciences:10.1073/pnas.2002543117.
- 1075 Hamilton, H., R. L. Smyth, B. E. Young, T. G. Howard, C. Tracey, S. Breyer, D. R. Cameron, A.  
1076 Chazal, A. K. Conley, and C. Frye. 2022. Increasing taxonomic diversity and spatial  
1077 resolution clarifies opportunities for protecting imperiled species in the US. Ecological  
1078 Applications:e2534.
- 1079 Hawkins, B. A. 2010. Multiregional comparison of the ecological and phylogenetic structure of  
1080 butterfly species richness gradients. Journal of Biogeography 37:647–656.
- 1081 Hijmans, R. J., J. van Etten, M. Mattiuzzi, M. Sumner, J. A. Greenberg, O. P. Lamingueiro, A.  
1082 Bevan, E. B. Racine, and A. Shortridge. 2021. raster: Geographic Data Analysis and  
1083 Modeling, Version 2.9-23, R package.
- 1084 Hochmair, H. H., R. H. Scheffrahn, M. Basille, and M. Boone. 2020. Evaluating the data quality  
1085 of iNaturalist termite records. PLOS ONE 15:e0226534.
- 1086 Hughes, J. B., G. C. Daily, and P. R. Ehrlich. 2000. Conservation of insect diversity: a habitat  
1087 approach. Conservation Biology 14:1788–1797.
- 1088 Jamwal, P. S., M. Di Febbraro, M. L. Carranza, M. Savage, and A. Loy. 2021. Global change on  
1089 the roof of the world: Vulnerability of Himalayan otter species to land use and climate  
1090 alterations. Diversity and Distributions.
- 1091 Janzen, D. H., and W. Hallwachs. 2019. Perspective: Where might be many tropical insects?  
1092 Biological Conservation 233:102–108.
- 1093 Katoh, K., K. Misawa, K. Kuma, and T. Miyata. 2002. MAFFT: a novel method for rapid



- 1094 multiple sequence alignment based on fast Fourier transform. *Nucleic Acids Research*  
1095 30:3059–3066.
- 1096 Kellner, K. 2017. R Package ‘jagsUI’: a wrapper around ‘rjags’ to streamline ‘JAGS’ Analyses,  
1097 v.1.4.9.
- 1098 Kirchhoff, C., C. T. Callaghan, D. A. Keith, D. Indiarito, G. Taseski, M. K. J. Ooi, T. D. Le  
1099 Breton, T. Mesaglio, R. T. Kingsford, and W. K. Cornwell. 2021. Rapidly mapping fire  
1100 effects on biodiversity at a large-scale using citizen science. *Science of The Total*  
1101 *Environment* 755:142348.
- 1102 van Klink, R., D. E. Bowler, K. B. Gongalsky, A. B. Swengel, A. Gentile, and J. M. Chase.  
1103 2020. Meta-analysis reveals declines in terrestrial but increases in freshwater insect  
1104 abundances. *Science* 368:417–420.
- 1105 Li, L., C. J. Stoeckert, and D. S. Roos. 2003. OrthoMCL: identification of ortholog groups for  
1106 eukaryotic genomes. *Genome Research* 13:2178–2189.
- 1107 Maes, D., W. Vanreusel, I. Jacobs, K. Berwaerts, and H. Van Dyck. 2012. Applying IUCN Red  
1108 List criteria at a small regional level: a test case with butterflies in Flanders (north  
1109 Belgium). *Biological Conservation* 145:258–266.
- 1110 McLaughlin, J. F., J. J. Hellmann, C. L. Boggs, and P. R. Ehrlich. 2002. Climate change hastens  
1111 population extinctions. *Proceedings of the National Academy of Sciences of the United*  
1112 *States of America* 99:6070–6074.
- 1113 NABA. 2018. Checklist of North American Butterflies Occurring North of Mexico - Edition 2.4.
- 1114 Naeem, S., R. Chazdon, J. E. Duffy, C. Prager, and B. Worm. 2016. Biodiversity and human  
1115 well-being: an essential link for sustainable development. *Proceedings of the Royal Society*  
1116 *B: Biological Sciences* 283:20162091.

- 1117 Nakamura, Y. 2011. Conservation of butterflies in Japan: status, actions and strategy. *Journal of*  
1118 *Insect Conservation* 15:5–22.
- 1119 New, T. R., R. M. Pyle, J. A. Thomas, C. D. Thomas, and P. C. Hammond. 1995. *Butterfly*  
1120 *Conservation Management*. *Annual Review of Entomology* 40:57–83.
- 1121 Nguyen, L.-T., H. A. Schmidt, A. Von Haeseler, and B. Q. Minh. 2015. IQ-TREE: a fast and  
1122 effective stochastic algorithm for estimating maximum-likelihood phylogenies. *Molecular*  
1123 *Biology and Evolution* 32:268–274.
- 1124 Nice, C. C., M. L. Forister, Z. Gompert, J. A. Fordyce, and A. M. Shapiro. 2014. A hierarchical  
1125 perspective on the diversity of butterfly species’ responses to weather in the Sierra Nevada  
1126 Mountains. *Ecology* 95:2155–2168.
- 1127 Opler, P. A. 1999. *A field guide to western butterflies*. Houghton Mifflin Harcourt.
- 1128 Pelham, J. P. 2022. *A catalogue of the butterflies of the United States and Canada*.
- 1129 Pelton, E. M., C. B. Schultz, S. J. Jepsen, S. H. Black, and E. E. Crone. 2019. Western monarch  
1130 population plummets: status, probable causes, and recommended conservation actions.  
1131 *Frontiers in Ecology and Evolution* 7:258.
- 1132 Pilliod, D. S., M. I. Jeffries, R. S. Arkle, and D. H. Olson. 2020. Reptiles under the conservation  
1133 umbrella of the greater sage-grouse. *The Journal of Wildlife Management* 84:478–491.
- 1134 Prudic, K. L., J. C. Oliver, B. V Brown, and E. C. Long. 2018. Comparisons of citizen science  
1135 data-gathering approaches to evaluate urban butterfly diversity. *Insects* 9:186.
- 1136 RCoreTeam. 2020. *R: A language and environment for statistical computing* R Foundation for  
1137 *Statistical Computing*, Vienna, Austria. URL <https://www.R-project.org/>.
- 1138 Revell, L. J. 2012. phytools: an R package for phylogenetic comparative biology (and other  
1139 things). *Methods in Ecology and Evolution*:217–223.

- 1140 Riecke, T. V, D. Gibson, M. Kéry, and M. Schaub. 2021. Sharing detection heterogeneity  
1141 information among species in community models of occupancy and abundance can  
1142 strengthen inference. *Ecology and evolution* 11:18125–18135.
- 1143 Salcido, D. M., M. L. Forister, H. G. Lopez, and L. A. Dyer. 2020. Ecosystem services at risk  
1144 from declining taxonomic and interaction diversity in a tropical forest. *Scientific Reports*  
1145 10:1–10.
- 1146 Samways, M. J. 2007. Insect conservation: a synthetic management approach. *Annu. Rev.*  
1147 *Entomol.* 52:465–487.
- 1148 SCAN. 2022. Symbiota Collections of Arthropods Network <https://scan-bugs.org/portal/>.
- 1149 Schultz, C. B., N. M. Haddad, E. H. Henry, and E. E. Crone. 2019. Movement and demography  
1150 of at-risk butterflies: building blocks for conservation. *Annual Review of Entomology*  
1151 64:167–184.
- 1152 Scott, J. A. 1986. *The butterflies of North America*. Stanford University Press, Stanford,  
1153 California.
- 1154 Sekar, S. 2012. A meta-analysis of the traits affecting dispersal ability in butterflies: can  
1155 wingspan be used as a proxy? *Journal of Animal Ecology* 81:174–184.
- 1156 Sen, P. K. 1968. Estimates of the regression coefficient based on Kendall's tau. *Journal of the*  
1157 *American Statistical Association* 63:1379–1389.
- 1158 Shapiro, A. M. 1996. Status of butterflies. Pages 743–757 *Sierra Nevada Ecosystem Project:*  
1159 *Final Report to Congress Vol. II*. Center for Water and Wildland Resources, University of  
1160 California, Davis, Davis, California.
- 1161 Shapiro, A. M. 2022. Art Shapiro's Butterfly Site <https://butterfly.ucdavis.edu/>.
- 1162 Staude, I. R., L. M. Navarro, and H. M. Pereira. 2020. Range size predicts the risk of local

- 1163 extinction from habitat loss. *Global Ecology and Biogeography* 29:16–25.
- 1164 Strebel, N., M. Kéry, J. Guélat, and T. Sattler. 2022. Spatiotemporal modelling of abundance  
1165 from multiple data sources in an integrated spatial distribution model. *Journal of*  
1166 *Biogeography* 49:563–575.
- 1167 van Swaay, C., D. Maes, S. Collins, M. L. Munguira, M. Šašić, J. Settele, R. Verovnik, M.  
1168 Warren, M. Wiemers, and I. Wynhoff. 2011. Applying IUCN criteria to invertebrates: How  
1169 red is the Red List of European butterflies? *Biological Conservation* 144:470–478.
- 1170 Theil, H. 1950. A rank-invariant method of linear and polynomial regression analysis.  
1171 *Indagationes Mathematicae* 12:173.
- 1172 Turvey, S. T., and J. J. Cries. 2019. Extinction in the Anthropocene. *Current Biology* 29:R982–  
1173 R986.
- 1174 USDA. 2020. National Agricultural Statistics Service Cropland Data Layer. Published crop-  
1175 specific data layer. <https://nassgeodata.gmu.edu/CropScape/>.
- 1176 Wagner, D. L. 2019. Insect declines in the Anthropocene. *Annual Review of Entomology* 65.
- 1177 Wepprich, T., J. R. Adrion, L. Ries, J. Wiedmann, and N. M. Haddad. 2019. Butterfly abundance  
1178 declines over 20 years of systematic monitoring in Ohio, USA. *PLOS ONE* 14:e0216270.
- 1179 Wilson, E. O. 1987. The little things that run the world (the importance and conservation of  
1180 invertebrates). *Conservation Biology* 1:344–346.
- 1181 Wilson, J. S., A. D. Pan, D. E. M. General, and J. B. Koch. 2020. More eyes on the prize: an  
1182 observation of a very rare, threatened species of Philippine Bumble bee, *Bombus*  
1183 *irisanensis*, on iNaturalist and the importance of citizen science in conservation biology.  
1184 *Journal of Insect Conservation* 24:727–729.
- 1185 Yu, G., D. K. Smith, H. Zhu, Y. Guan, and T. T. Lam. 2017. ggtree: an R package for

1186 visualization and annotation of phylogenetic trees with their covariates and other associated  
1187 data. *Methods in Ecology and Evolution* 8:28–36.

1188 Zhang, J., Q. Cong, J. Shen, P. A. Opler, and N. V Grishin. 2019. Genomics of a complete  
1189 butterfly continent. *BioRxiv*:829887.

1190

1191

**TABLE 1.** Top 50 subspecies ranked by quantitative risk index, including taxonomic name and family, states in which subspecies are found, as well as the species group (A or B) to which the nominal species belongs. The taxonomy used here is based on Pelham (2022) because of the emphasis on subspecific distinctions; where the generic or specific names differ from NABA (2018), the alternative name is in brackets (exceptions to that are the *Euphilotes* taxa, for which taxonomy and differences in usage are complex; in those cases we have not listed synonymies between Pelham and NABA); common names are also given here as they are more stable for some subspecies than trinomials. Species marked with an asterisk (\*) are protected by the US Endangered Species Act; \*\* = currently under review for protection.

| Risk  | Subspecies                                                                                        | States         | Family      | Group |
|-------|---------------------------------------------------------------------------------------------------|----------------|-------------|-------|
| 0.837 | <i>Philotiella speciosa bohartorum</i> , Bohart's small blue                                      | CA             | Lycaenidae  | B     |
| 0.750 | <i>Argynnis</i> [ <i>Speyeria</i> ] <i>adiaste adiate</i> , unsilvered fritillary                 | CA             | Nymphalidae | B     |
| 0.723 | <i>Euchloe hyantis andrewsi</i> , Andrew's marble                                                 | CA             | Pieridae    | A     |
| 0.720 | <i>Icaricia</i> [ <i>Plebejus</i> ] <i>saepiolus aureolus</i> , San Gabriel Mtns greenish blue    | CA             | Lycaenidae  | A     |
| 0.712 | <i>Euphilotes pallescens mattonii</i> , Mattoni's blue                                            | NV             | Lycaenidae  | B     |
| 0.692 | <i>Cercyonis oetus alkalorum</i> , small wood-nymph                                               | NV             | Nymphalidae | A     |
| 0.677 | <i>Argynnis</i> [ <i>Speyeria</i> ] <i>nokomis nokomis</i> , Great Basin nokomis fritillary **    | AZ, CO, NM, UT | Nymphalidae | B     |
| 0.677 | <i>Euphilotes pallescens arenamontana</i> , San Mountain blue                                     | NV             | Lycaenidae  | B     |
| 0.677 | <i>Euphilotes pallescens calneva</i> , Honey Lake blue                                            | CA, NV         | Lycaenidae  | B     |
| 0.677 | <i>Hesperia miramae longaevicola</i> , White Mountains skipper                                    | CA, NV         | Hesperiidae | B     |
| 0.677 | <i>Satyrrium polingi organensis</i> , Organ Mountains Poling's hairstreak                         | NM             | Lycaenidae  | B     |
| 0.677 | <i>Euphilotes pallescens ricei</i> , Rice's blue                                                  | NV             | Lycaenidae  | B     |
| 0.677 | <i>Philotiella speciosa septentrionalis</i> , Great Basin small blue                              | NV             | Lycaenidae  | B     |
| 0.664 | <i>Euphilotes enoptes primavera</i> , dotted blue                                                 | NV             | Lycaenidae  | A     |
| 0.654 | <i>Megathymus ursus deserti</i> , desert yucca borer                                              | AZ             | Hesperiidae | B     |
| 0.653 | <i>Argynnis</i> [ <i>Speyeria</i> ] <i>nokomis carsonensis</i> , Carson Valley nokomis fritillary | CA, NV         | Nymphalidae | B     |
| 0.650 | <i>Colias skinneri</i> [ <i>pelidne</i> ] <i>hinchliffi</i> , Skinner's pelidne sulphur           | OR             | Pieridae    | B     |
| 0.629 | <i>Callophrys mossii bayensis</i> , San Bruno elfin *                                             | CA             | Lycaenidae  | A     |
| 0.629 | <i>Callophrys mossii marinensis</i> , Moss' elfin *                                               | CA             | Lycaenidae  | A     |
| 0.629 | <i>Euphilotes bernardino minuta</i> , Baking Powder Flat blue                                     | NV             | Lycaenidae  | A     |
| 0.629 | <i>Hesperia leonardus montana</i> , Leonard's skipper *                                           | CO             | Hesperiidae | B     |
| 0.629 | <i>Euphilotes mojave virginensis</i> , Virgin Mountains Mojave blue                               | AZ, NV, UT     | Lycaenidae  | A     |
| 0.626 | <i>Hesperia uncas fulvapalla</i> , Uncas skipper                                                  | NV             | Hesperiidae | B     |
| 0.609 | <i>Argynnis</i> [ <i>Speyeria</i> ] <i>egleis yolaboli</i> , Great Basin fritillary               | CA             | Nymphalidae | A     |
| 0.605 | <i>Pseudocopaeodes eunus alinea</i> , Eunus skipper                                               | CA, NV         | Hesperiidae | B     |
| 0.605 | <i>Hesperia uncas giulianii</i> , Railroad Valley skipper                                         | CA             | Hesperiidae | B     |
| 0.605 | <i>Hesperia uncas grandiosa</i> , Big Smoky Valley skipper                                        | NV             | Hesperiidae | B     |
| 0.605 | <i>Callophrys loki</i> [ <i>gryneus</i> ] <i>thornei</i> , Thorne's hairstreak                    | CA             | Lycaenidae  | A     |
| 0.600 | <i>Cercyonis pegala carsonensis</i> , Carson Valley wood nymph                                    | CA, NV         | Nymphalidae | A     |
| 0.591 | <i>Euphilotes battoides fusimaculata</i> , square dotted blue                                     | NV             | Lycaenidae  | A     |
| 0.581 | <i>Boloria improba acrocynema</i> , Uncompahgre fritillary *                                      | CO             | Nymphalidae | B     |
| 0.581 | <i>Phyciodes cocyta</i> [ <i>selenis</i> ] <i>arenacolor</i> , Steptoe Valley crescent            | NV             | Nymphalidae | A     |
| 0.581 | <i>Euphilotes enoptes aridorum</i> , dotted blue                                                  | CA, NV         | Lycaenidae  | A     |
| 0.581 | <i>Argynnis</i> [ <i>Speyeria</i> ] <i>zerene behrensii</i> , Behren's silverspot *               | CA             | Nymphalidae | A     |
| 0.581 | <i>Argynnis</i> [ <i>Speyeria</i> ] <i>callippe callippe</i> , Callippe silverspot *              | CA             | Nymphalidae | A     |
| 0.581 | <i>Icaricia</i> [ <i>Plebejus</i> ] <i>shasta charlestonensis</i> , Mt. Charleston blue *         | CA             | Lycaenidae  | A     |
| 0.581 | <i>Euphydryas anicia</i> [ <i>chalcedona</i> ] <i>cloudcrofti</i> , Sacramento Mtns checkerspot   | NM             | Nymphalidae | A     |
| 0.581 | <i>Euphilotes pallescens emmeli</i> , Emmel's blue                                                | AZ, NV, UT     | Lycaenidae  | A     |
| 0.581 | <i>Icaricia</i> [ <i>Plebejus</i> ] <i>icarioides fenderi</i> , Fender's blue *                   | OR             | Lycaenidae  | A     |
| 0.581 | <i>Argynnis</i> [ <i>Speyeria</i> ] <i>zerene hippolyta</i> , Oregon silverspot *                 | CA, OR, WA     | Nymphalidae | A     |
| 0.581 | <i>Euchloe ausonides insulanus</i> , island marble *                                              | WA             | Pieridae    | A     |
| 0.581 | <i>Pyrgus ruralis lagunae</i> , Laguna Mountains skipper *                                        | CA             | Hesperiidae | A     |
| 0.581 | <i>Apodemia mormo langei</i> , Lange's metalmark *                                                | CA             | Riodinidae  | A     |
| 0.581 | <i>Icaricia</i> [ <i>Plebejus</i> ] <i>icarioides missionensis</i> , Mission blue *               | CA             | Lycaenidae  | A     |
| 0.581 | <i>Cercyonis oetus pallescens</i> , small wood-nymph                                              | NV             | Nymphalidae | A     |
| 0.581 | <i>Glaucopsyche lygdamus palosverdesensis</i> , Palos Verde blue *                                | CA             | Lycaenidae  | A     |
| 0.581 | <i>Polites sabuleti sinemaculata</i> , bleached sandhill skipper                                  | NV             | Hesperiidae | A     |
| 0.581 | <i>Argynnis</i> [ <i>Speyeria</i> ] <i>zerene sonomensis</i> , Zerene fritillary                  | CA             | Nymphalidae | A     |
| 0.581 | <i>Euphydryas editha taylori</i> , Taylor's checkerspot *                                         | OR, WA         | Nymphalidae | A     |
| 0.568 | <i>Glaucopsyche piasus gabrielina</i> , San Gabriel Mtns arrowhead blue                           | CA             | Lycaenidae  | A     |

1193 **Figure legends**

1194

1195 **FIGURE 1** Schematic overview of main inputs, processes and products associated with the  
1196 generation of risk index values for species (subspecies are treated separately). As noted in the  
1197 key, data sources are in brown, analyses (and other calculations) are in blue boxes, variables  
1198 (used in the creation of the risk index) are in red, and the primary products are in green. The  
1199 central branching path illustrates the division of species into the A and B groups, with  
1200 observational data contributing to the A group risk assessment on the left, and other data types  
1201 contributing to B group assessment on the right. The 10 variables (in red) are identical to the  
1202 columns in Figure 3, although labelled slightly different here, especially for the observational  
1203 variables: " $\beta$  year" is the year coefficient from analyses of Shapiro data summarizing change  
1204 through time; "P(persistence)" is the probability of population persistence from 50-year  
1205 forecasts, and  $\Delta$  range is an index of change in geographic range based on the relationship  
1206 between the last 15 years of iNaturalist observations while controlling for the size of the expert-  
1207 derived range. Variables on the right ("range area", "precipitation," etc.) are more self-  
1208 explanatory. Also note that the expert-derived geographic ranges contribute to the risk index  
1209 calculations both directly ("range area" and "voltinism") and indirectly as indicated with  
1210 connecting arrows. Finally, the "Risk analysis" process box (towards the lower left) illustrates  
1211 the analysis of A group risk that was used to partly inform the weighting scheme for the B group  
1212 species.

1213

1214 **FIGURE 2** Summary of differences between species in the A and B groups. The 184 A group  
1215 species are those with observational data from either the Shapiro monitoring program or the

1216 NABA annual counts; the 212 B group species are not included in those data sources (at least not  
1217 with sufficient abundance to be used in our primary models). Comparisons in panels (a) through  
1218 (g) are shown as violin plots with kernel density estimates and horizontal lines marking medians  
1219 inside rectangles spanning interquartile ranges; vertical lines are upper and lower fences  
1220 computed as the third quartile plus one and a half times the interquartile range, and the first  
1221 quartile minus one and a half times the interquartile range, respectively. Colors in panels (a)  
1222 through (f) match those used in Figure 3 for the same variables. Area-weighted latitudinal  
1223 midpoints are shown in panel (g), and the mosaic plot in (h) shows the biogeographical  
1224 breakdown of qualitative range positions for A and B group species (e.g., species with ranges in  
1225 the South category have a majority of their range south of the US-Mexico border, with only a  
1226 small presence north of the border in the western US).

1227

1228 **FIGURE 3** The top 50 species with the highest risk rankings in the A group (on the left) and the  
1229 B group (on the right). The two panels have some features in common, and some unique  
1230 elements. In common they both show the extent to which different variables are associated with  
1231 higher or lower risk for each species: a large circle under NABA occupancy, for example, marks  
1232 a species that we infer as being at risk because of low forecast occupancy (probability of  
1233 population persistence) across currently-extant locations; similarly, a large circle under  
1234 development indicates a species at risk because of high exposure to developed lands, and a large  
1235 circle under geographic range indicates corresponding risk associated with a relatively small  
1236 range. The sizes of the circles were assigned separately within the two lists, A and B group  
1237 species, and thus indicate relative differences within those lists. Although all variables are shown  
1238 for comparison, the overall risk ranking for the A group species is based solely on the first three



1239 variables (NABA occupancy, Shapiro monitoring, and iNaturalist, to the left of the vertical gray  
1240 line), while the ranking for the B group species is based entirely on the other seven variables (see  
1241 main text for details, and Figure 1). Both panels also have in common the quantitative risk values  
1242 shown to the right (e.g., the risk index for *Vanessa annabella* in panel A is 0.675); note that the  
1243 risk values for the A group species include 85% credible intervals (in parentheses),  
1244 encompassing uncertainty derived from Bayesian analyses of both NABA and Shapiro data. The  
1245 capital letters (N, S, E and W) running down the left side of each panel are qualitative  
1246 biogeographical descriptions (see main text for details), and the asterisks next to species names  
1247 flag taxonomic issues (see Table S3). A unique element of the panel on the left is the sample size  
1248 in parentheses, e.g. "(14,10)" for *Vanessa annabella*, which is the number of locations from  
1249 which data were included from the NABA and Shapiro datasets, respectively. Finally, on the far  
1250 right of panel (b), the lambda symbols represent the results of individual time series models run  
1251 for the species present in the NABA program but without enough sites and years to be included  
1252 in the main model (and thus not a part of the A list); a blue symbol indicates a species with an  
1253 80% or greater probability of increasing in recent years, while a red symbol indicates an 80%  
1254 chance of decreasing, and black is neither increasing nor decreasing. The other species (beyond  
1255 the top 50 highest ranked shown here) are included in Figures S6, S7, and S8.

1256

1257 **FIGURE 4** Overview of site-specific trends through time for *Vanessa annabella* at Shapiro sites  
1258 (on the left) and NABA sites (on the right and along the bottom). Plots for Shapiro sites are  
1259 shown with decreasing elevation (cooler colors are montane sites) and colored to match the  
1260 elevational profile of Northern California shown below the map of the western US. The y-axes  
1261 for Shapiro plots are the fraction of days a species was seen at a site in a year (Shapiro data were

1262 truncated at 1984 for analyses, but earlier years are shown here and in Figures 5 and 6). Plots for  
1263 NABA sites are shown with decreasing latitude (starting with the most northern sites), with  
1264 symbols matching the locations shown in the central map. Values shown in NABA plots have  
1265 been adjusted for variation in sampling effort, and values plotted are total counts of individuals  
1266 on a natural log scale. Finally, the light gray triangles on the central map are locations of  
1267 iNaturalist records within the last 15 years that were used to estimate the difference between  
1268 expert-derived geographic range and community scientist-derived area of occupancy (based on  
1269 the iNaturalist records). Adult and caterpillar images by Camryn Maher, copyright 2022.

1270  
1271 **FIGURE 5** Overview of site-specific trends through time for *Euchloe ausonides* at Shapiro sites  
1272 (on the left) and NABA sites (on the right). Plots for Shapiro sites are shown with decreasing  
1273 elevation (cooler colors are montane sites) and colored to match the elevational profile of  
1274 Northern California shown below the map of the western US. The y-axes for Shapiro plots are  
1275 the fraction of days a species was seen at a site in a year. Plots for NABA sites are shown with  
1276 decreasing latitude (starting with the most northern sites), with symbols matching the locations  
1277 shown in the central map. Values shown in NABA plots have been adjusted for variation in  
1278 sampling effort, and values plotted are total counts of individuals on a natural log scale. Finally,  
1279 the light gray triangles on the central map are locations of iNaturalist records within the last 15  
1280 years that were used to estimate the difference between expert-derived geographic range and  
1281 community scientist-derived area of occupancy (based on the iNaturalist records). Adult and  
1282 caterpillar images by Camryn Maher, copyright 2022.

1283

1284 **FIGURE 6** Overview of site-specific trends through time for *Poanes melane* at Shapiro sites  
1285 (on the left) and NABA sites (on the right). Plots for Shapiro sites are shown with decreasing  
1286 elevation (cooler colors are montane sites) and colored to match the elevational profile of  
1287 Northern California shown below the map of the western US. The y-axes for Shapiro plots are  
1288 the fraction of days a species was seen at a site in a year. Plots for NABA sites are shown with  
1289 decreasing latitude (starting with the most northern sites), with symbols matching the locations  
1290 shown in the central map. Values shown in NABA plots have been adjusted for variation in  
1291 sampling effort, and values plotted are total counts of individuals on a natural log scale. Finally,  
1292 the light gray triangles on the central map are locations of iNaturalist records within the last 15  
1293 years that were used to estimate the difference between expert-derived geographic range and  
1294 community scientist-derived area of occupancy (based on the iNaturalist records). Adult and  
1295 caterpillar images by Camryn Maher, copyright 2022.

1296  
1297 **FIGURE 7** The geography of risk for species with values in the upper 75th quantile of risk  
1298 indices as shown in Figure 3 (i.e., combining "medium" and "high" risk categories treated  
1299 separately in Figure 8). Panels (a) and (b) show average risk values among those high risk  
1300 species, separately for the A and B group species, while panels (c) and (d) show species richness  
1301 again for the A group and B group species.

1302  
1303 **FIGURE 8** The phylogenetic distribution of risk, here shown as three categories: high risk  
1304 (upper 90th quantile), medium risk (75th to 90th quantiles), and low risk (below the 75th  
1305 quantile). Species names in black are the A group species, other are B group. Butterfly images as  
1306 follows: (A) *Apodemia mormo* (Riodinidae); (B) *Euphilotes pallescens arenamontana*

1307 (Lycaenidae); (C) *Euchloe ausonides* (Pieridae); (D) *Polites sabuleti* (Hesperiidae); (E) *Adelpha*  
1308 *bredowii* (Nymphalidae); (F) *Papilio rutulus* (Papilionidae). Photo credits go to CAH (panels A,  
1309 C, E, and F); MLF (panels B and D). Bootstrap support is not shown but the vast majority of  
1310 nodes have support above 0.95; see Zhang et al. (2019) for additional details.

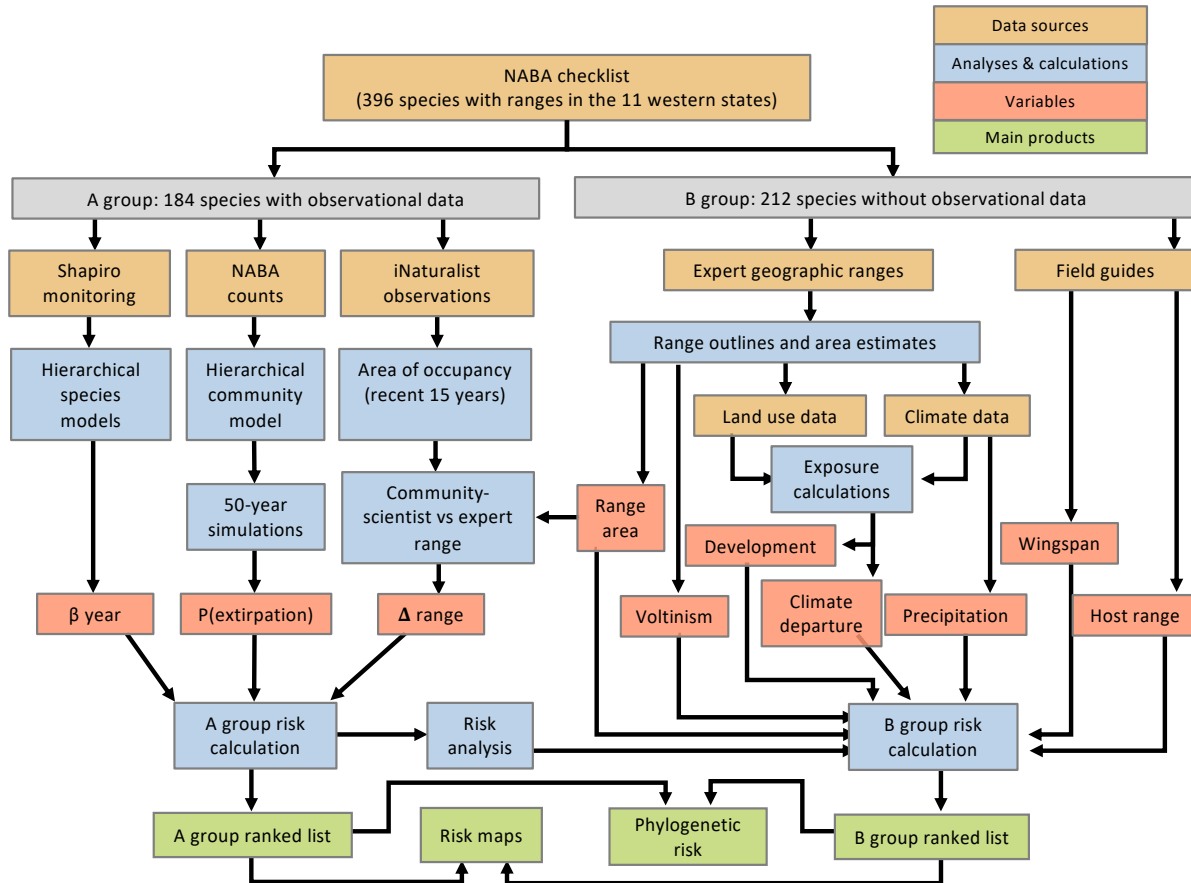

Figure 1

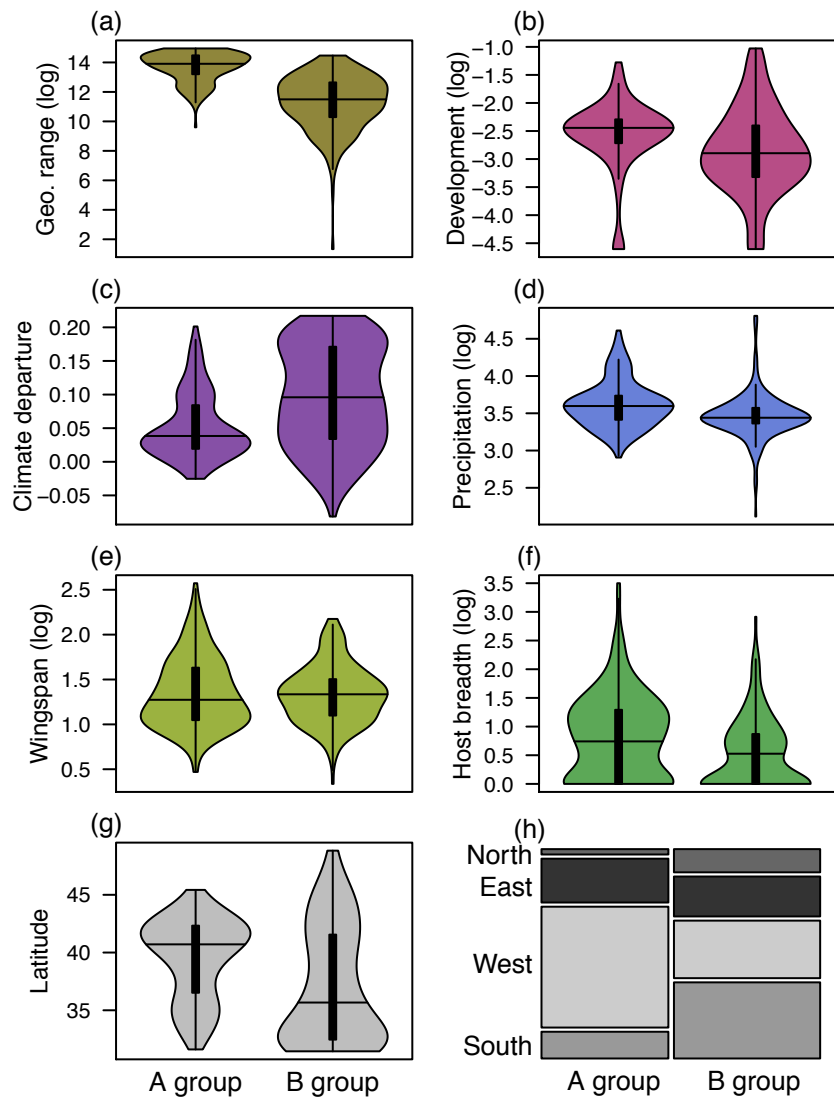

Figure 2

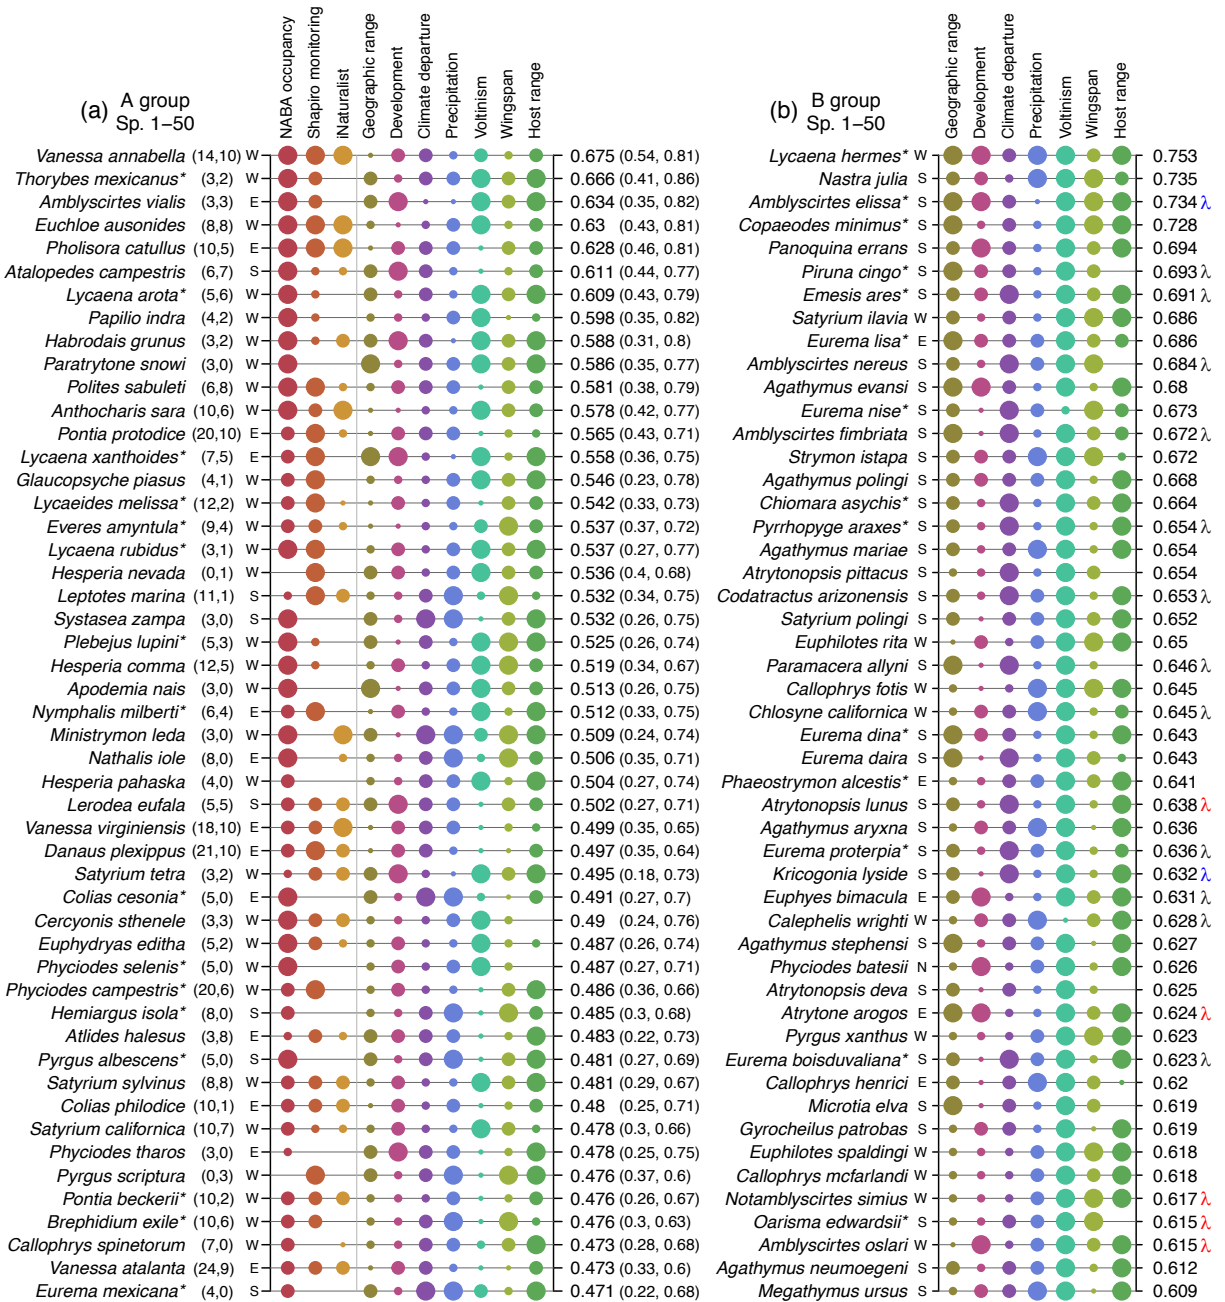

Figure 3

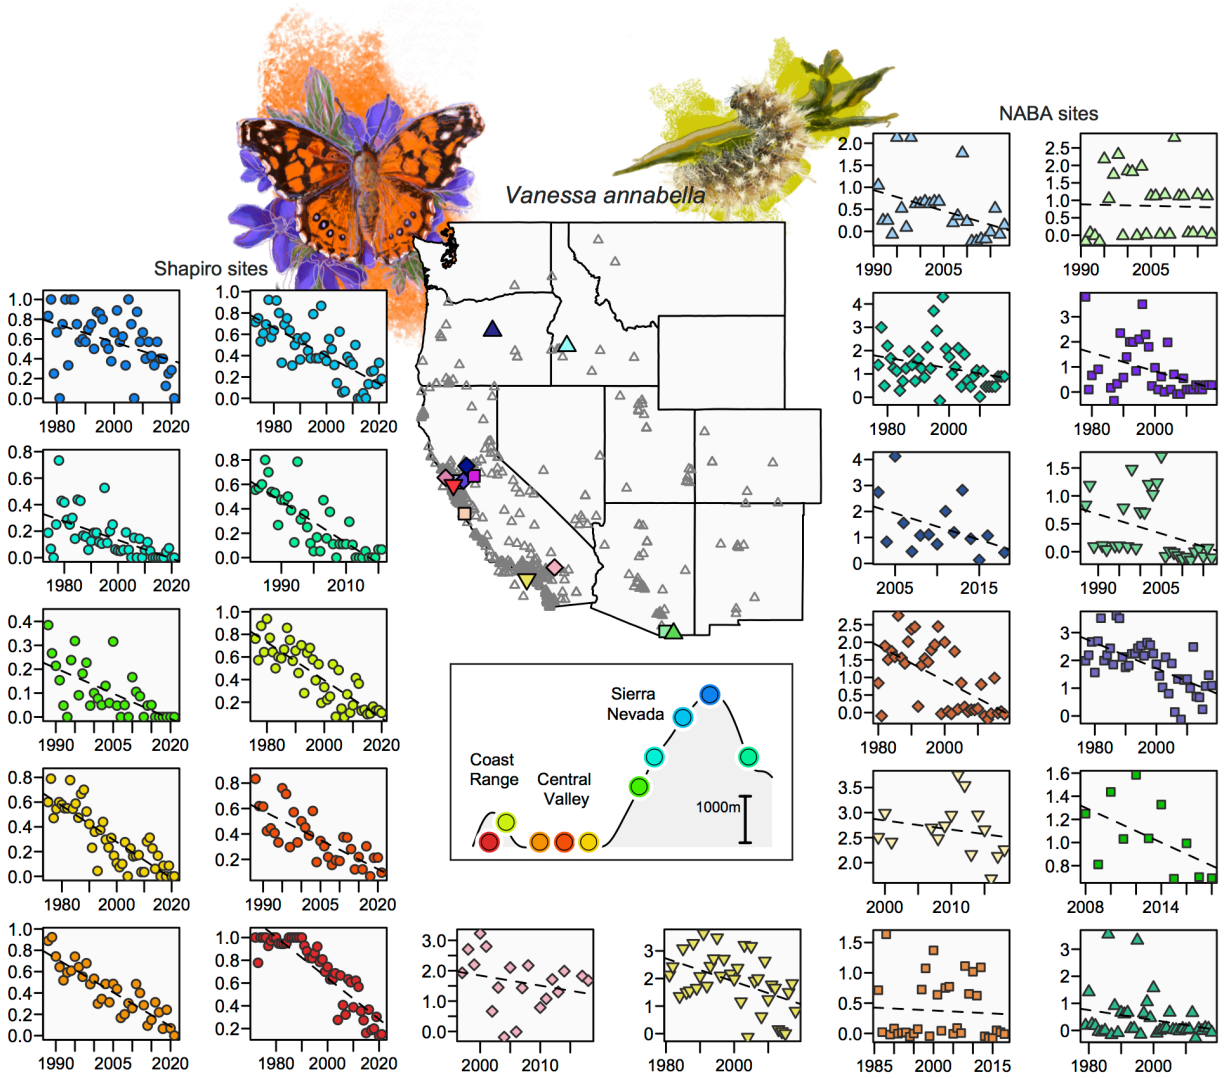

Figure 4



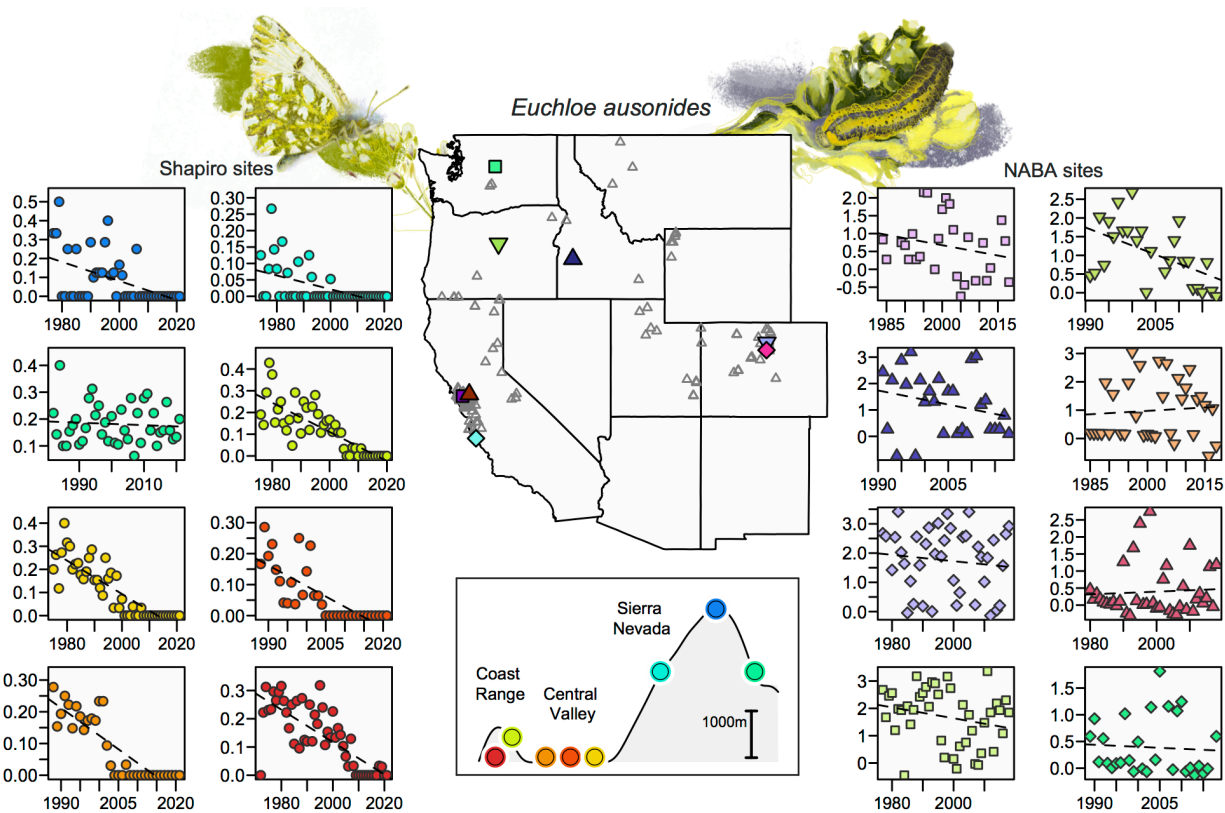

Figure 5

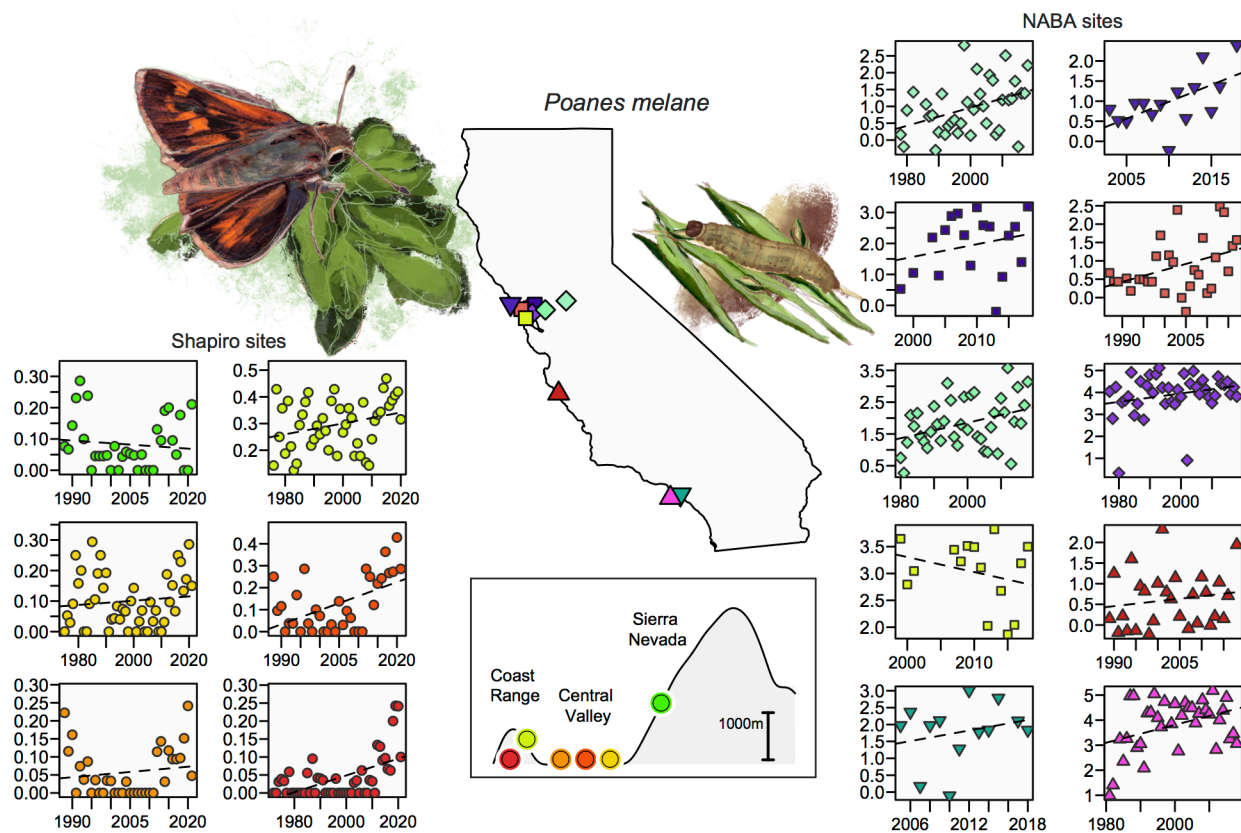

Figure 6

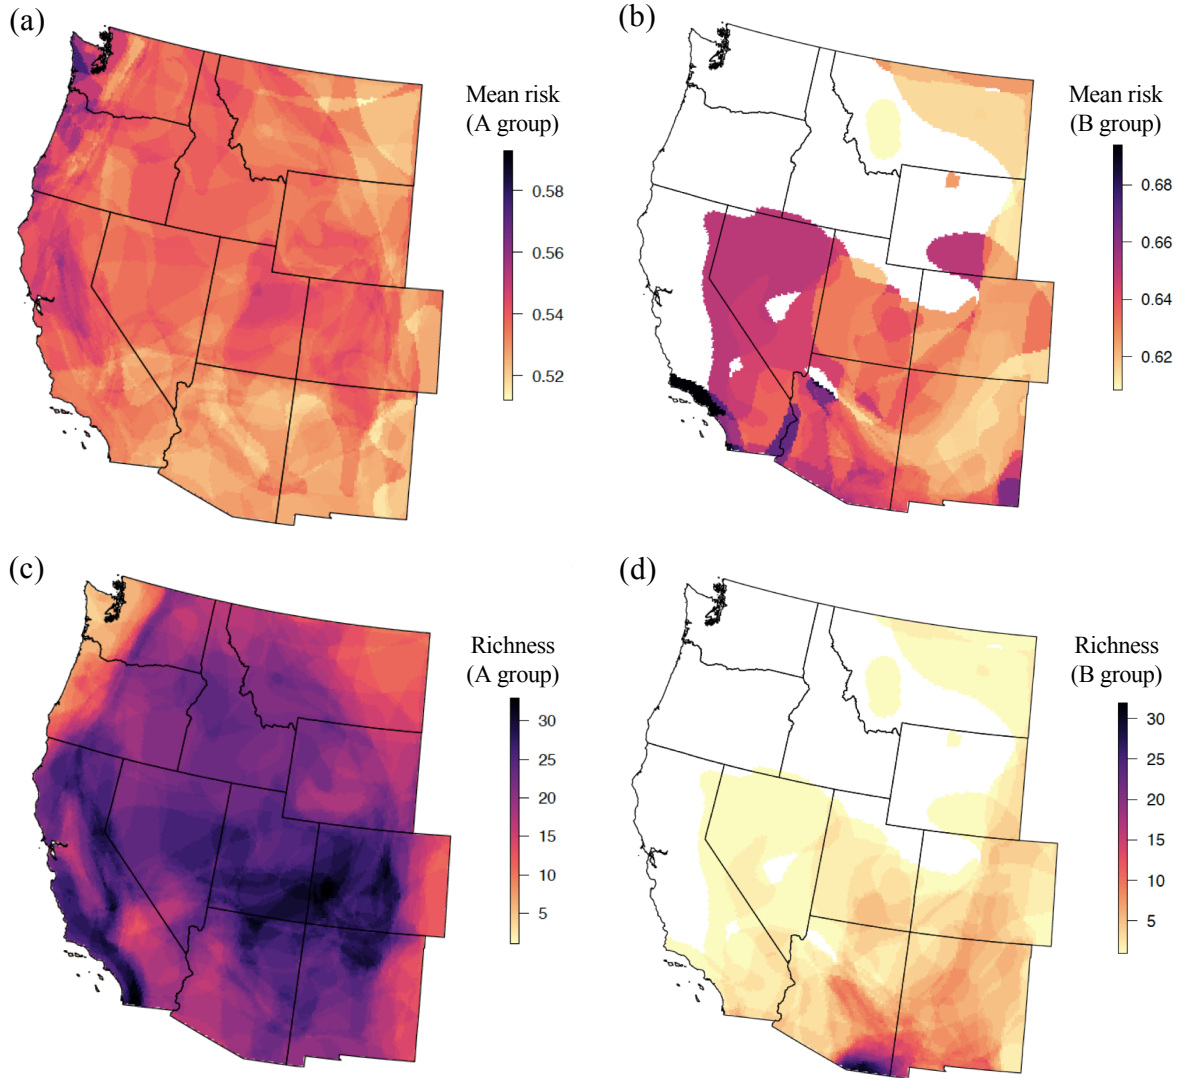

Figure 7

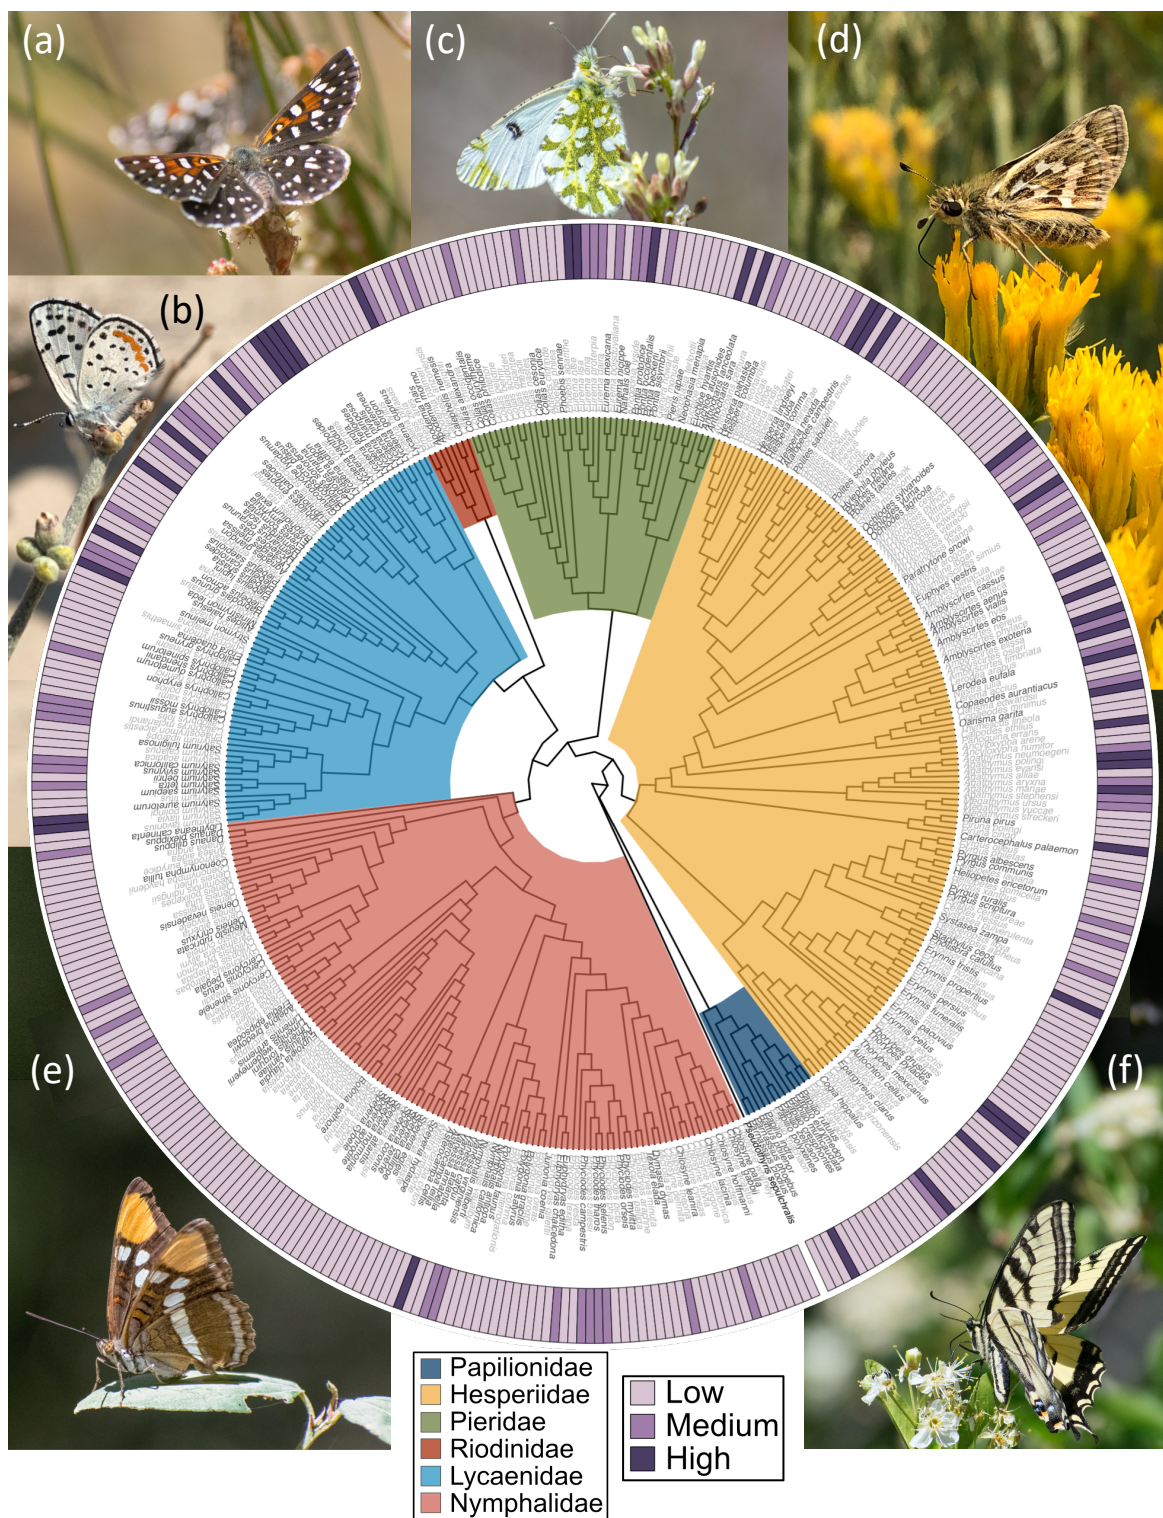

Figure 8
